# Supplementary material for: A system-view of Bordetella pertussis booster vaccine responses in adults primed with whole-cell versus acellular vaccine in infancy
Source: PubMed Central journal article supplement (PMC8119213; doi:10.1172/jci.insight.141023), 2021-04-08
Supplement: jciinsight-6-141023-s087.pdf [file jciinsight-6-141023-s087.pdf]

# Supplementary Materials

## Supplementary Figures

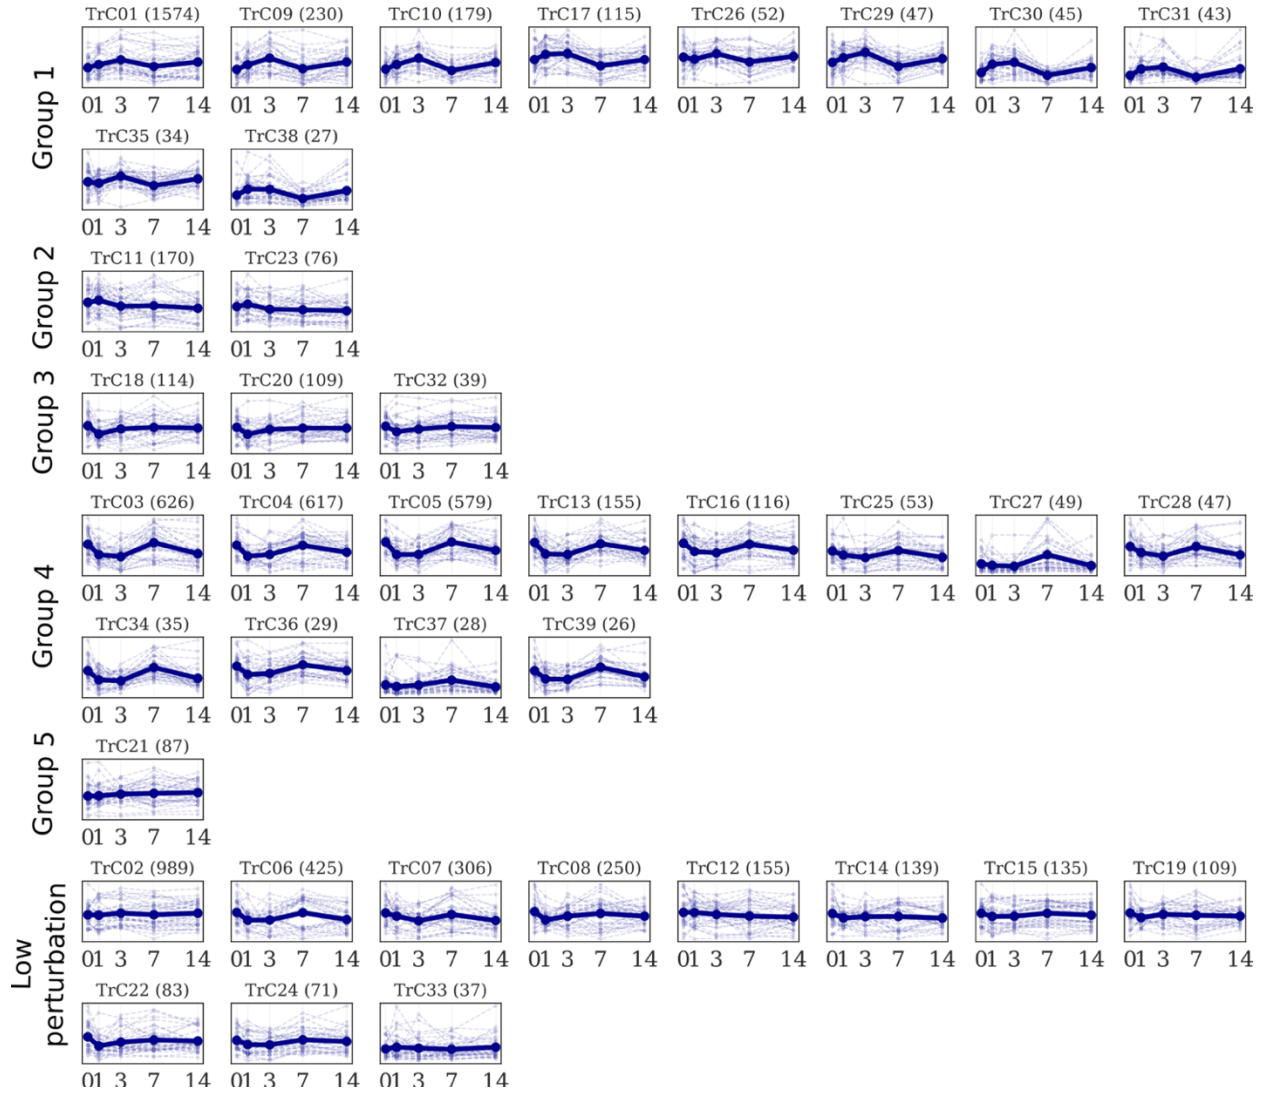

**Supplementary Figure 1. Longitudinal patterns of transcriptomic clusters.** Thick lines represent average of PC1 for a given cluster across all the profiled individuals. Thin lines represent PC1 values for a given individual. Clusters are grouped by longitudinal patterns. Data was generated with a total of 36 donors (n=36)

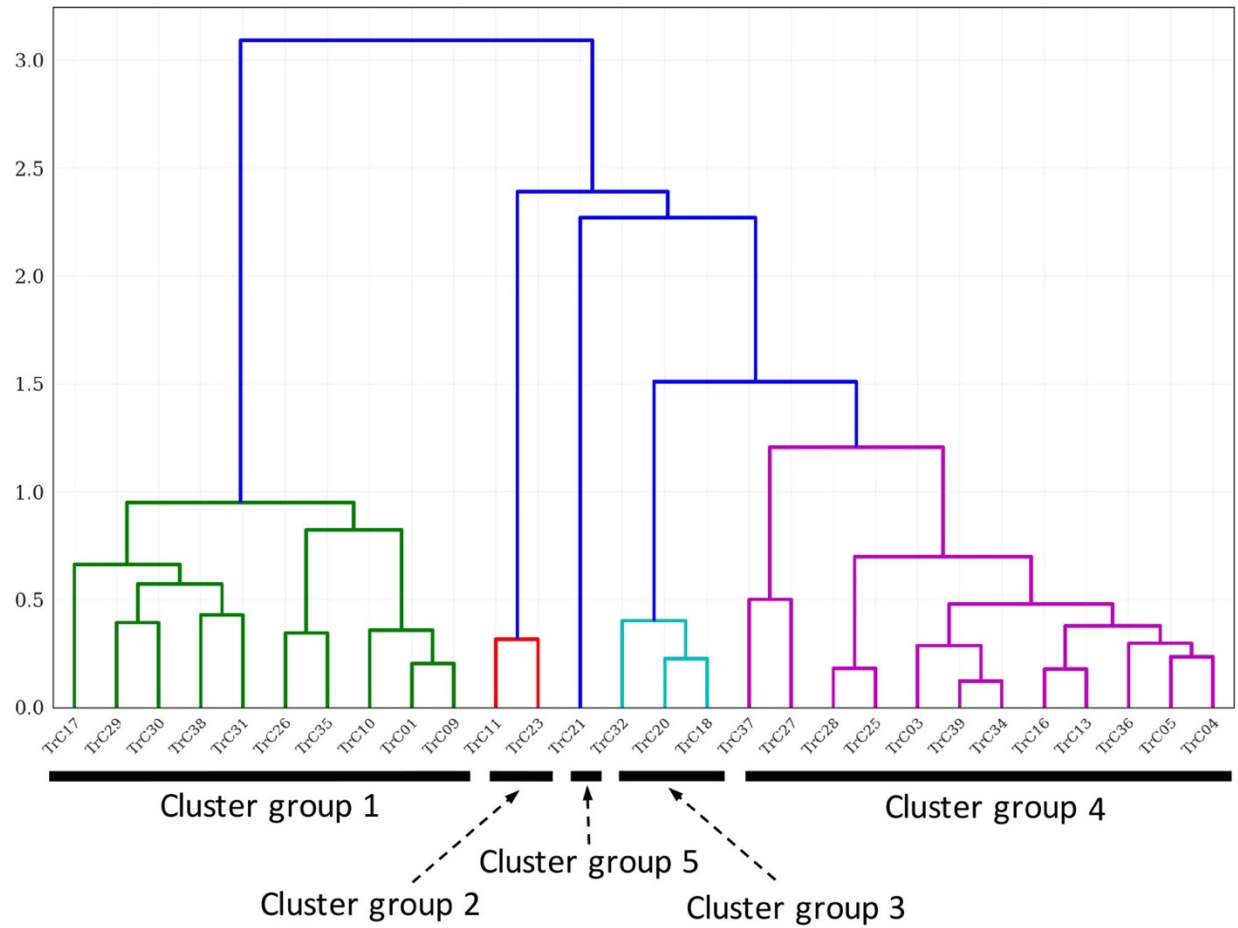

**Supplementary Figure 2.** Dendrogram for similarity of longitudinal patterns of transcriptomic clusters. Dendrogram was constructed using ‘cityblock’ distance metric and ‘average’ linkage method.

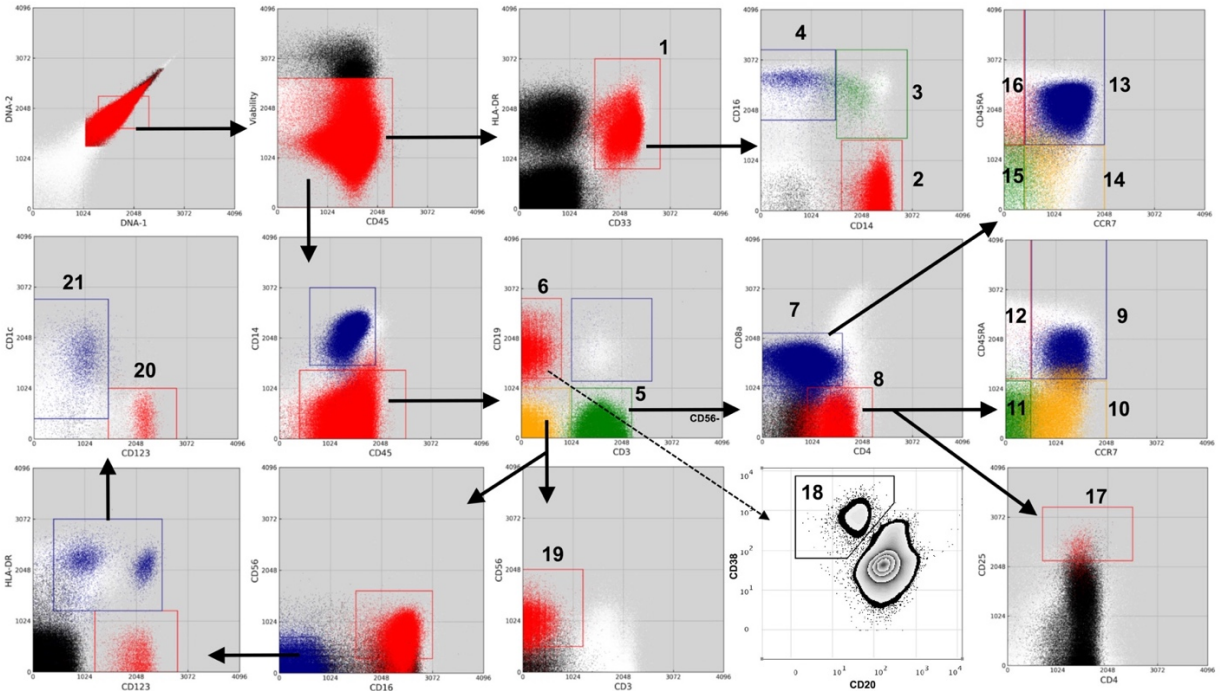

**Supplementary Figure 3. Identification of immune cell subsets in human PBMCs by CyTOF.** Each cell population was identified based on surface protein marker expression following the sequential dot-plot gating strategy by using manual gating analysis (cell population #18) or DAFi automated gating analysis (the other cell populations). Each number (Gate ID) represents a major population or subset. 1) Monocytes, 2) Classical Monocytes, 3) Intermediate Monocytes, 4) Non-classical Monocytes, 5) CD3<sup>+</sup> T cells, 6) B cells, 7) CD8<sup>+</sup> T cells, 8) CD4<sup>+</sup> T cells, 9) CD4<sup>+</sup> naïve, 10) CD4<sup>+</sup> Tcm, 11) CD4<sup>+</sup> Tem, 12) CD4<sup>+</sup> Temra, 13) CD8<sup>+</sup> naïve, 14) CD8<sup>+</sup> Tcm, 15) CD8<sup>+</sup> Tem, 16) CD8<sup>+</sup> Temra, 17) Tregs, 18) ASCs (Plasmablasts), 19) NK cells, 20) pDCs, 21) mDCs. Detailed gating strategy and analysis methods are described in Materials and Methods. Representative 2D plots are shown for illustration purpose.

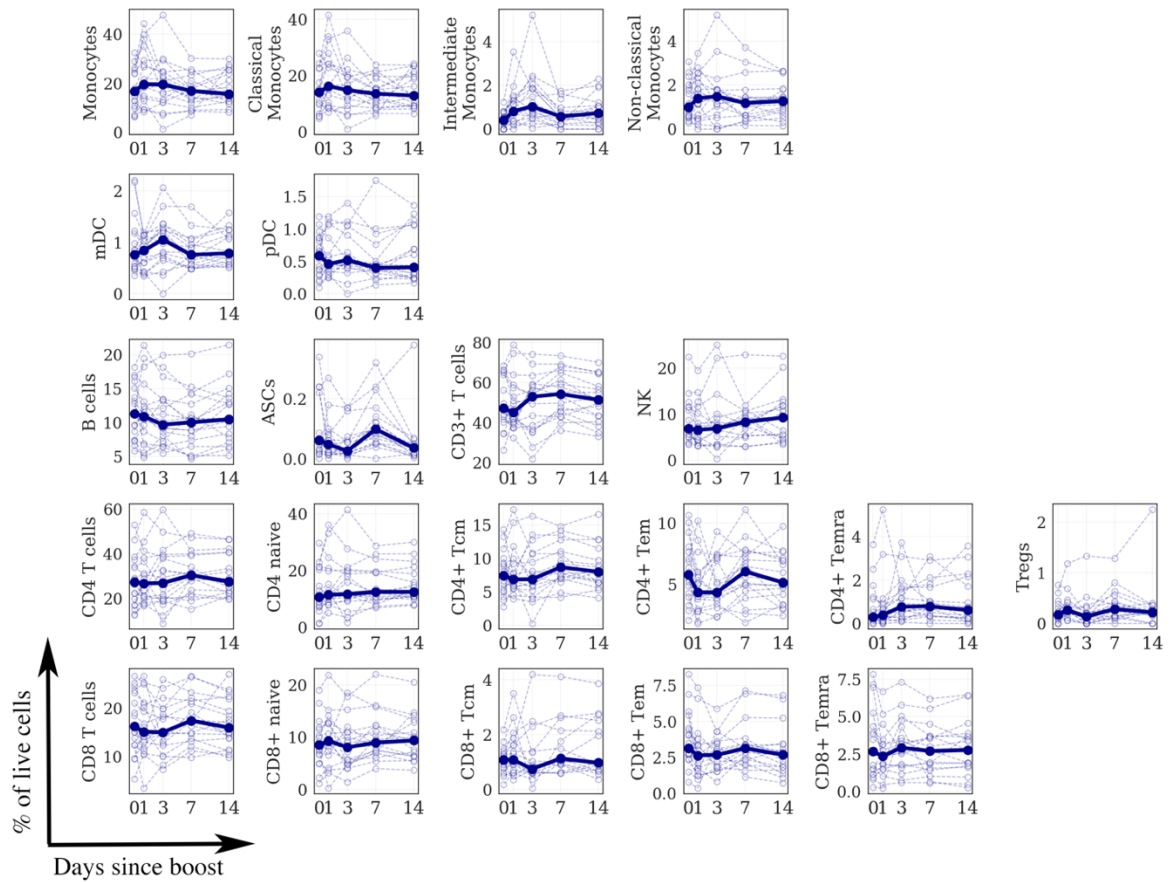

**Supplementary Figure 4. Longitudinal patterns of cell populations frequency profiled with CyTOF.** Each graphic represents the longitudinal kinetics of the percentage of live cells from total PBMC for each individual population (y axis) determined by high-dimensional automated gated analysis of data generated by CyTOF assay. Data are expressed as connected time points from day 0 to day 1, 3, 7 and 14 post boosts for each individual donor (thin lines) or the median of all (bold line). Data was generated with a total of 18 donors (n=18).

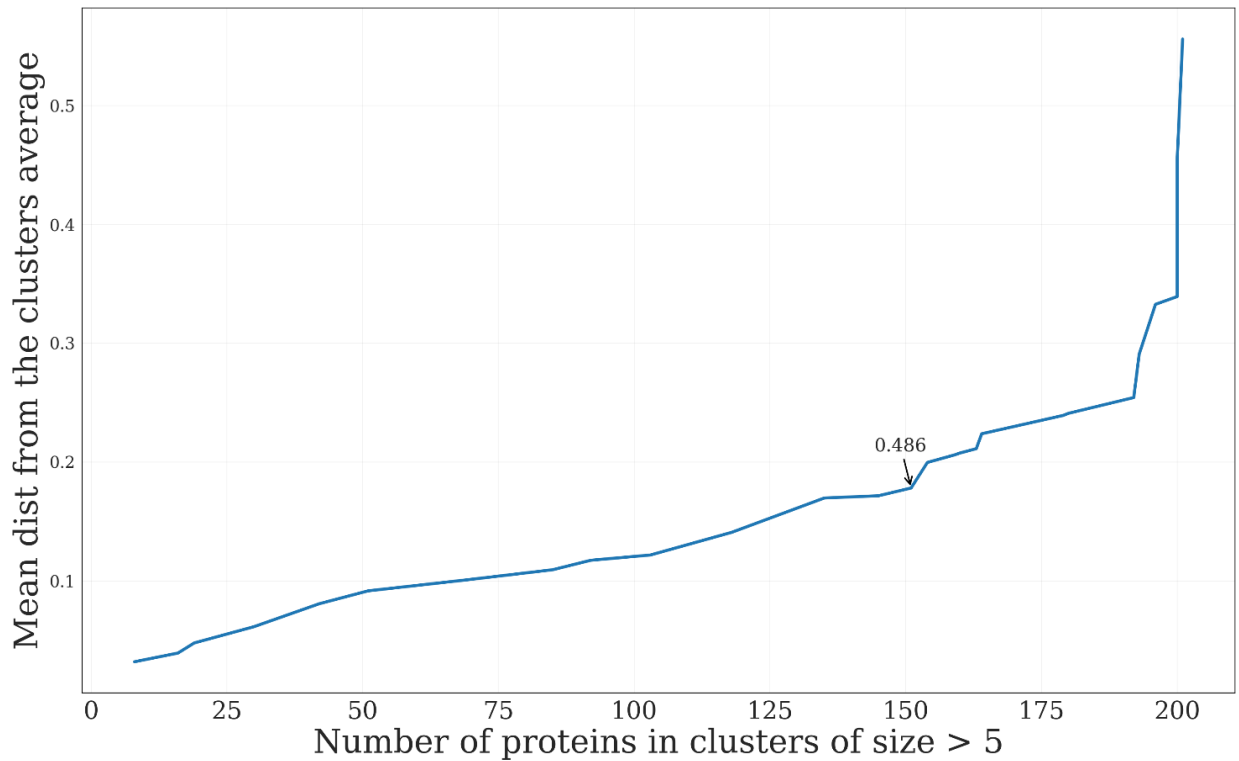

**Supplementary Figure 5. Cut-off threshold for proteomics data clustering.** X-axis indicates number of proteins in clusters of size greater than 5. Y-axis indicates measure of cluster tightness. More specifically, it is correlation of every protein in the cluster with the cluster's mean, averaging across all the proteins in clusters containing 5 or more genes. Annotated point indicates a threshold of 0.486 chosen for downstream analysis. It indicates a fraction of maximum inter-protein distance.

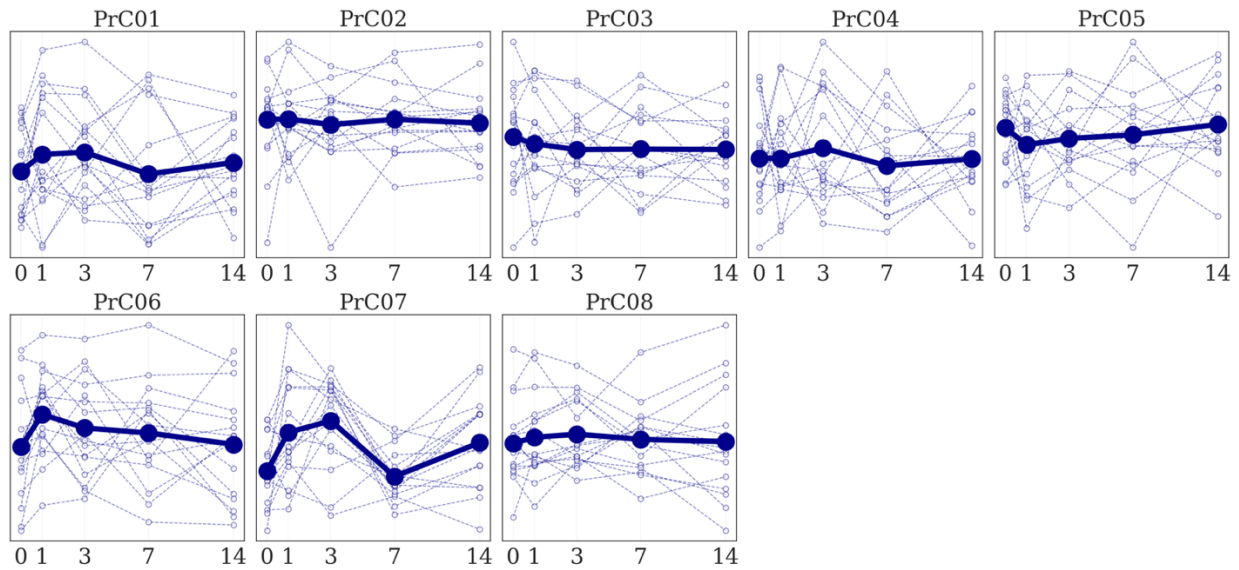

**Supplementary Figure 6. Longitudinal patterns of serum protein clusters.** Thick lines represent average of PC1 for a given cluster. Averaging is done across donors of the same cohort: either primed with aP or wP vaccine. Thin lines in the background represent PC1 for every individual. Number of proteins comprising a cluster is given in brackets in the title above every plot. Data are expressed as connected time points from day 0 to day 1, 3, 7 and 14 post boosts for each individual donor (thin lines) or the median of all (bold line). Data was generated with a total of 16 donors (n=16) after exclusion of 2 donors (See material and methods).

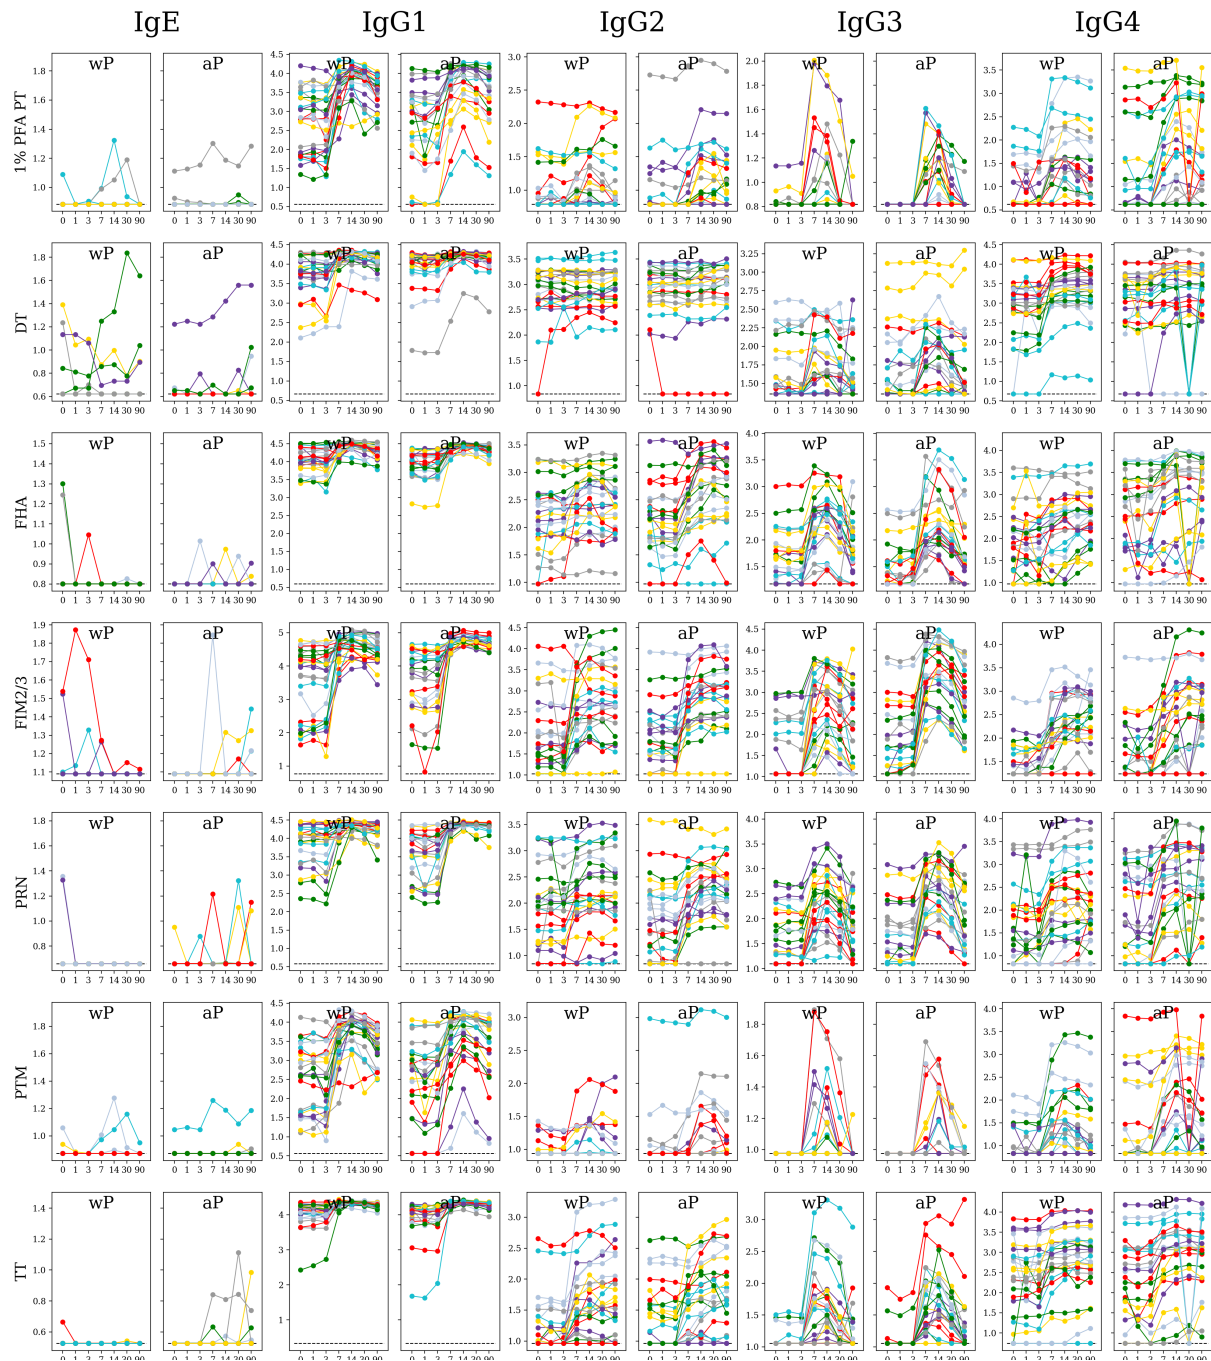

**Supplementary Figure 7. Quantification of Tdap antigen-specific immunoglobulins.** Profiles of IgE and IgG1-4 in seven antigens from Tdap vaccine: 1% PFA PT (pertussis toxoid denaturated in 1% paraformaldehyde), DT (diphtheria toxoid), FHA (Filamentous hemagglutinin), FIM2/3 (Fimbriae 2/3), PRN (pertactin), PTM (pertussis toxin mutant), TT (tetanus toxoid). Every immunoglobulin-antigen combination has two subplots, individually for DTwP- and DTaP-primed cohorts. Note an increase of IgG immunoglobulins against all the antigens at day 7. Y-axis indicates log10 of the IgE, IgG1, IgG2, IgG3, or IgG4 MFI. X-axis indicates days after vaccine boost (zero means pre-vaccination). Antigen-specific antibodies were evaluated for a total of 58 study participants (n=58).

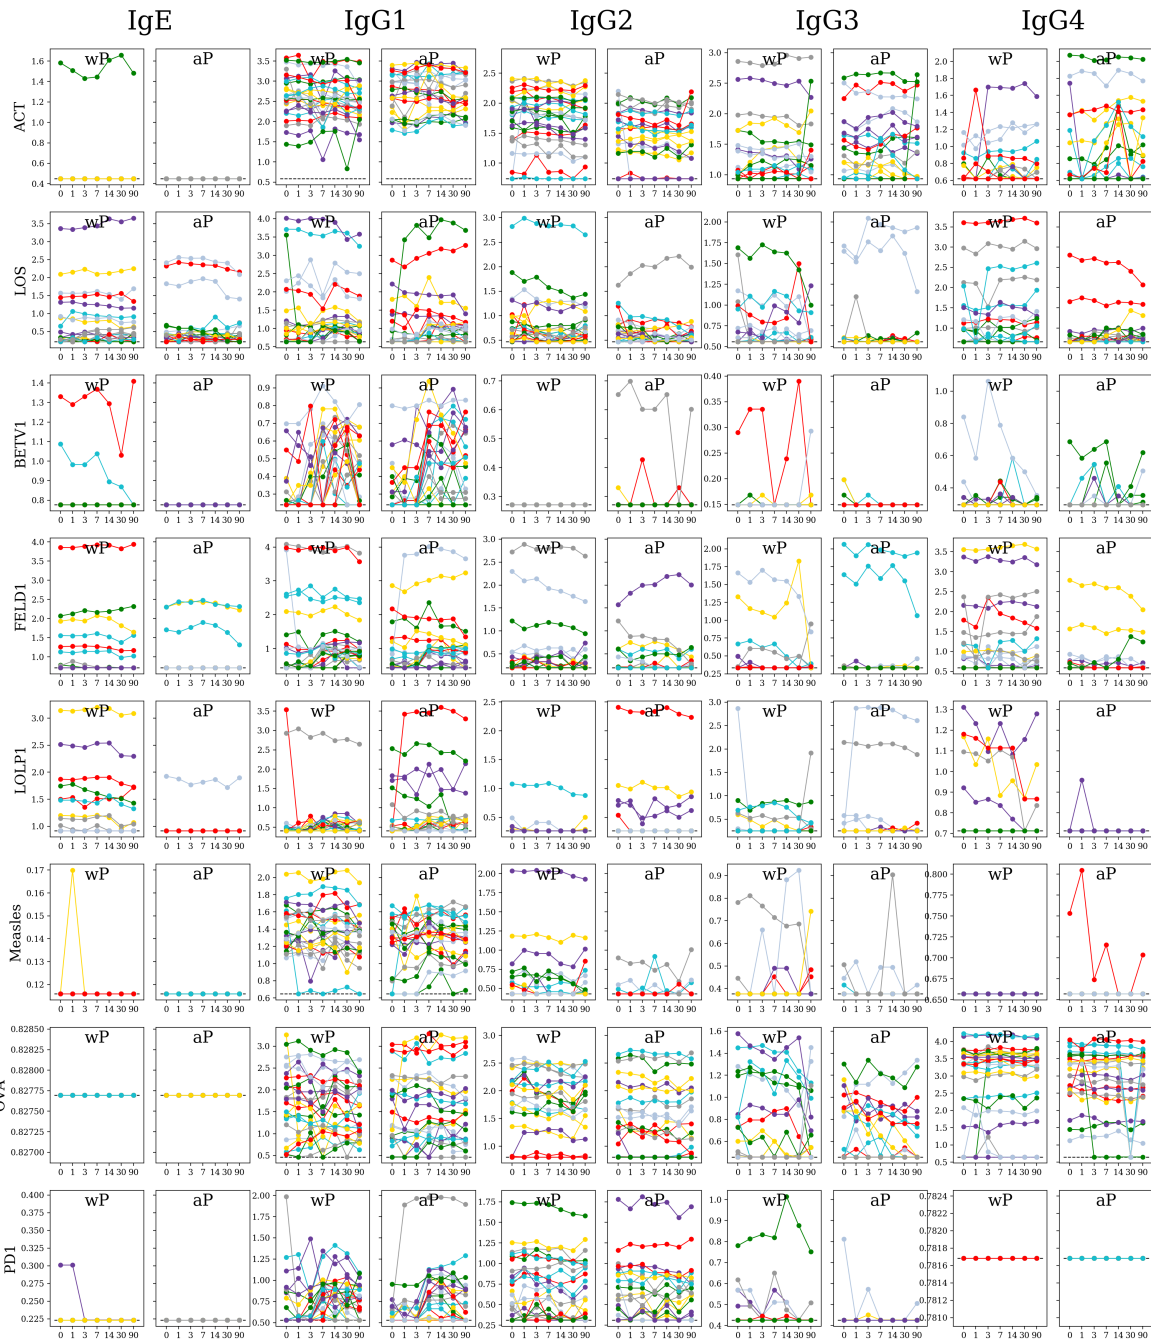

**Supplementary Figure 8. Quantification of immunoglobulins against whole-cell vaccine antigens, allergens and control antigens.** Profiles of IgE and IgG1-4 versus the following antigens are shown: ACT (Adenylate Cyclase, wP antigen), LOS (lipopolysaccharide, wP antigen), BETV1 (seasonal allergen), FelD1 (allergen), LOLP1 (seasonal allergen), Measles (control), OVA (control), PD1 (control). Every immunoglobulin-antigen combination has two subplots, individually for DTwP- and DTaP-primed cohorts. Data is clipped to limit of detection. Y-axis indicates log<sub>10</sub> of the IgE, IgG1, IgG2, IgG3, or IgG4 MFI. X-axis indicates days after vaccine boost (zero means pre-vaccination). There is not consistent induction of immunoglobulin levels at day 7 against any of these antigens unlike in the previous figure. Antigen-specific antibodies were evaluated for a total of 58 study participants (n=58).



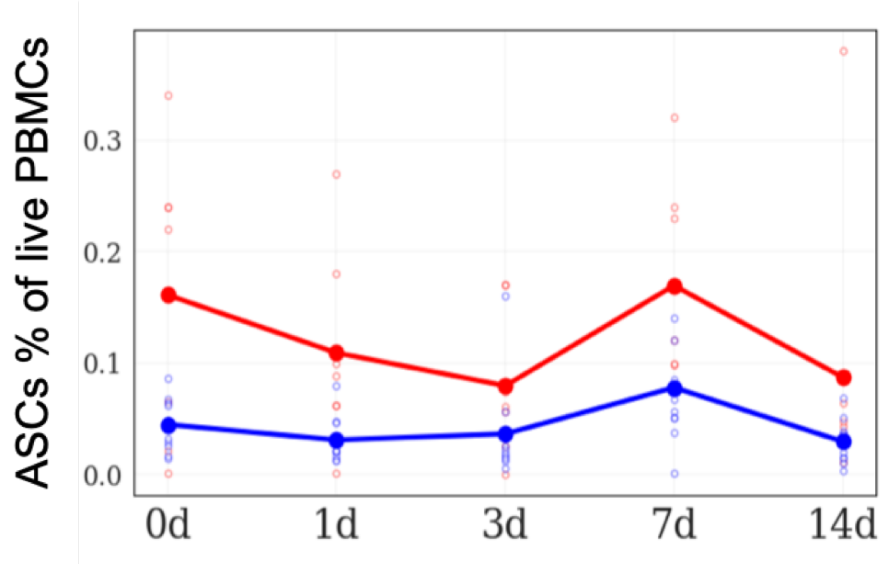

**Supplementary Figure 9. Frequency of antibody secreting cells across timepoints in aP vs wP infancy-primed individuals.** Frequency of antibody secreting cells (Y-axis) for each donor and timepoint (X-axis) is represented with an empty dot. Red dots belong to aP-primed individuals while blue dots represent wP-primed individuals in infancy. Bold lines and dots represent the median of the wP (Red) and aP (Blue). Data was generated with 10 wP and 8 aP donors for a total of 18 donors (n=18).

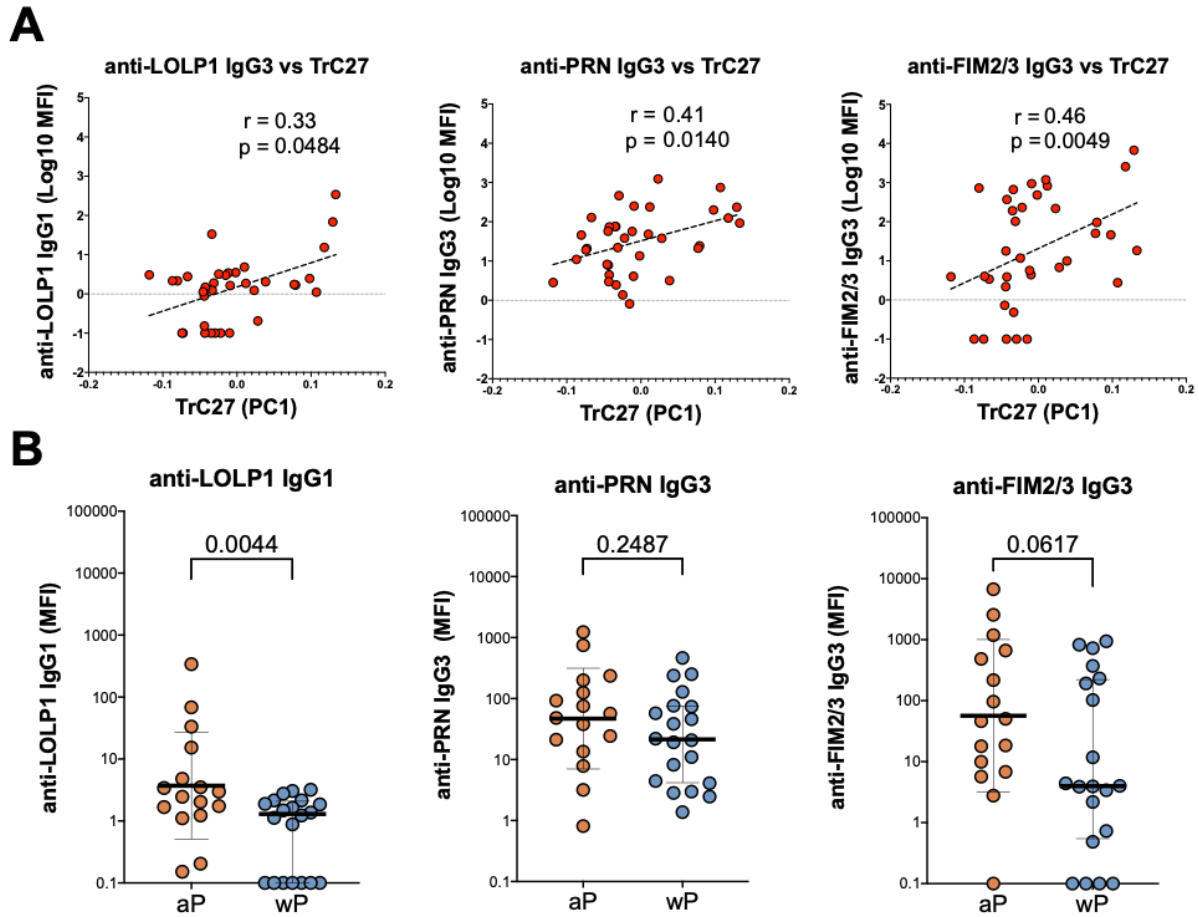

**Supplementary Figure 10. Baseline correlations of antigen-specific antibodies and transcriptomic cluster 27 (TrC27).** **A**) Graphs showing correlation of TrC27 (X-axis) and anti-LOLP1 IgG1, anti-PRN IgG3 and anti-FIM2/3 respectively (Y-axis). Units in the X axis consist in the individual PC1 for Cluster TrC27 while antibody concentration is expressed in the Y axis in mean fluorescence intensity (MFI). Statistical significance and  $r$  values were evaluated by Spearman correlation test with data from all the donors in the study for which antibody and transcriptomics data was obtained ( $n=36$ ). **B**) Group comparison of baseline plasma levels of anti-LOLP1 IgG1, anti-PRN IgG3 and anti-FIM2/3. Individuals are represented with red dots (aP) or blue dots (wP). Statistical differences were evaluated using two-sided, non-parametric Mann-Whitney test. Data was generated with 20 wP and 16 aP donors for which transcriptomic and antibody data was available for a total of 36 donors ( $n=36$ ). Geometric mean and SD are represented by error bars.

**A**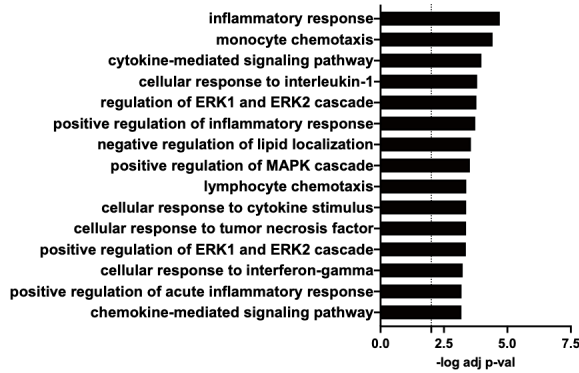**B**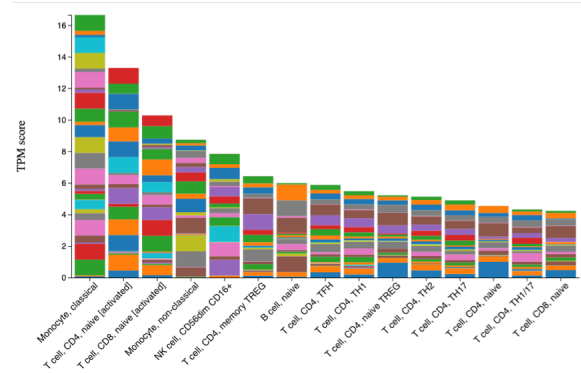

**Supplementary Figure 11. Pathway analysis and cell source of the immune signature identified at day 3 in a subset of aP donors.** **A)** Top 15 GO biological processes terms enriched in the transcriptomic signature (36 genes) identified in the subset of aP donors. Bars express  $-\log$  adjusted p values for each term and dotted line represents an adjusted p value of 0.05. **B)** Cellular source of the transcriptional signatures identified using DICE database tool CellTypeScore (<https://tools.dice-database.org/celltypescore/>). X axis shows immune cell types while Y-axis presents TPM expression normalized per cell type. Different colors seen in the bars account for each individual transcript.

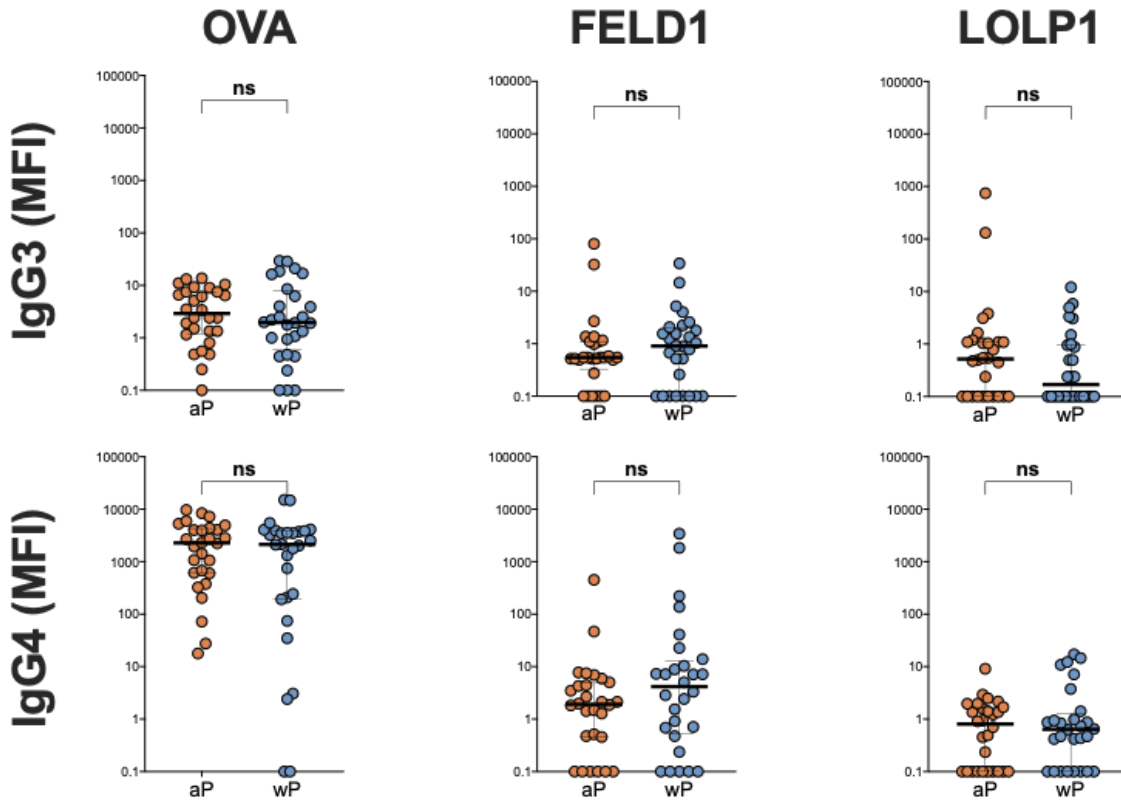

**Supplementary Figure 12. Group comparison of baseline levels of non-vaccine antigen-specific IgG3 and IgG4.** Baseline levels of antigen specific IgG3 and IgG4 against OVA, FELD1 and LOLP1. aP primed individuals are represented by red dots and wP primed individuals are represented in blue dots. Y-axis represents concentration of each antibody in mean fluorescence intensity a (MFI) in log scale. Data was generated for a total of 58 donors consisting in 28 for aP and 30 for wP primed individuals (n=58). Statistical differences were evaluated using a two-sided, non-parametric Mann-Whitney test. Bars and error bars represent geometric mean and SD.

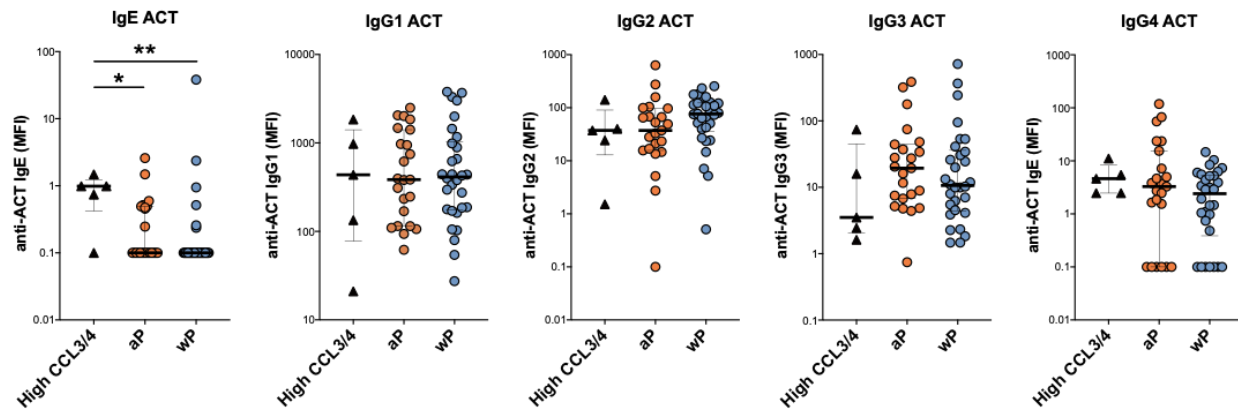

**Supplementary Figure 13. Baseline levels of ACT-specific antibodies in aP vs wP-primed individuals and a subset of aP donors with high inflammatory profile at days 3 and 7 post boost.** IgE, IgG1, IgG2, IgG3 and IgG4 levels of ACT-specific antibodies prior to Tdap booster vaccination. aP primed individuals are represented by red dots and wP primed individuals are represented in blue dots. aP donors with a differential cellular response at days 3- and 7- days post boost, are represented with black triangles. Y-axis represents concentration of each antibody in mean fluorescence intensity a (MFI) in log scale. Statistical differences were evaluated using a two-sided, non-parametric Mann-Whitney test (\* $p=0.0215$ , \*\* $p=0.0055$ ). Data was generated with a total of 58 donors ( $n=58$ ) divided in three groups of 5 High CCL3/CCL4 aP donors, 23 aP donors and 30 wP donors. Bars and error bars represent geometric mean and SD.

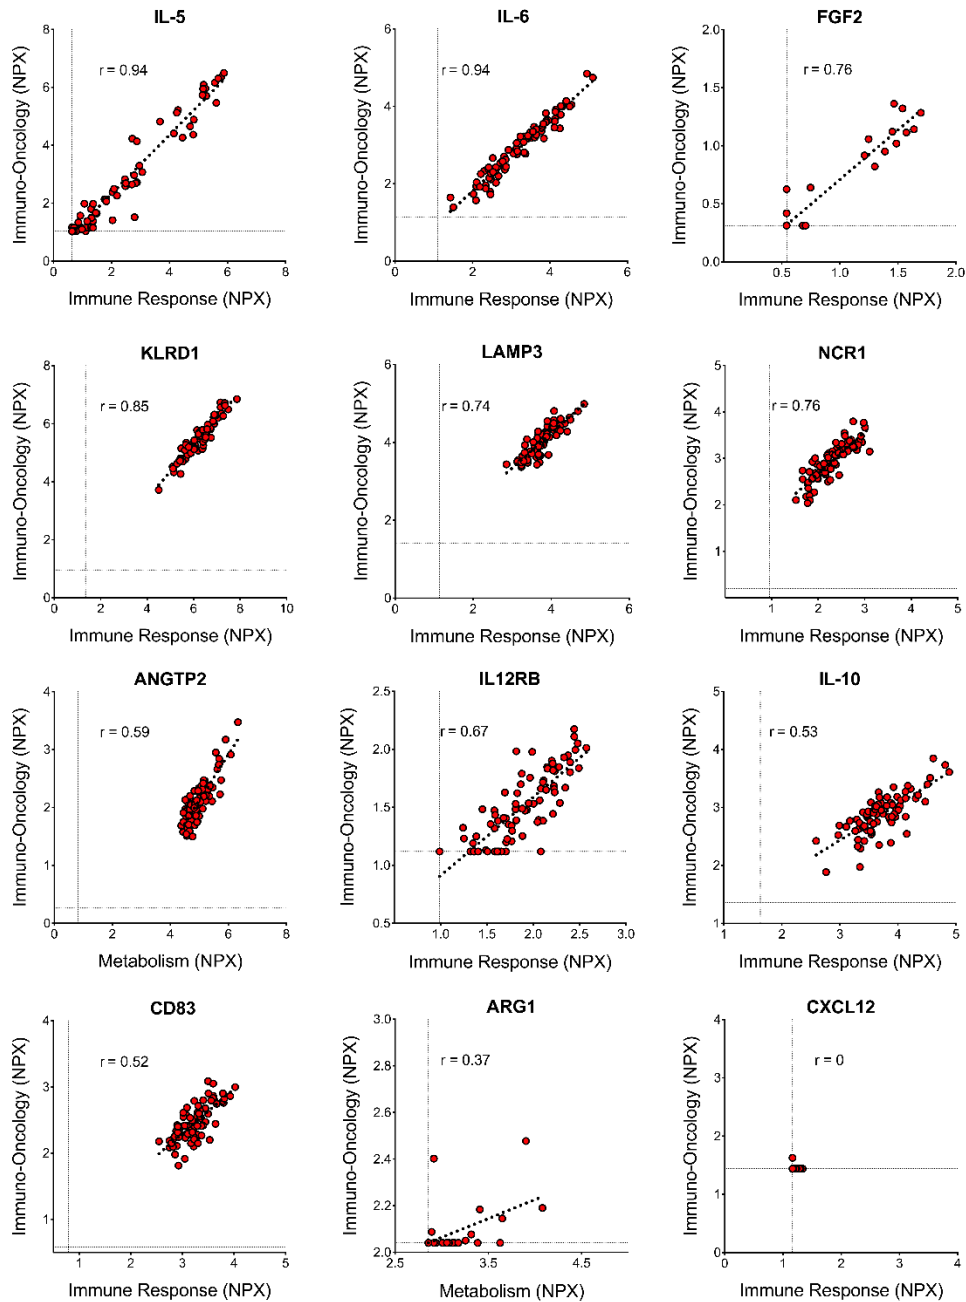

**Supplementary Figure 14. Correlation of duplicate analytes included in the proteomics analysis.** Each axis contains the normalized protein expression values (NPX) obtained by commercially available panels used to evaluate their presence in human plasma of 16 donors (n=16). Dotted line represents the limit of detection (LOD) of each analyte on each proximity extension assay panel (PEA). Correlations of the values obtained on each panel were performed with Spearman correlation test and r values for each individual analyte are represented on each graph. Values of Spearman  $r < 0.52$  are obtained in analytes with the majority of NPX values equal or close to the LOD as observed in ARG1 and CXCL12. Data was generated with a total of 16 donors (n=16).

# Supplementary Tables

*Supplementary Table 1 – Breakdown of assays performed per donor*

| COUNT | DONOR ID | GROUP | Assays performed      |        |                   |       |              | # ASSAYS |
|-------|----------|-------|-----------------------|--------|-------------------|-------|--------------|----------|
|       |          |       | SERUM IMMUNOGLOBULINS | RNAseq | PLASMA PROTEOMICS | CyTOF | PLASMA ELISA |          |
| 1     | 2730 *   | aP    | TRUE                  | TRUE   | TRUE              | TRUE  | TRUE         | 5        |
| 2     | 2886 ◊   | aP    | TRUE                  | TRUE   | TRUE              | TRUE  | TRUE         | 5        |
| 3     | 2902 *   | aP    | TRUE                  | TRUE   | TRUE              | TRUE  | TRUE         | 5        |
| 4     | 2903 ○   | aP    | TRUE                  | TRUE   | TRUE              | TRUE  | TRUE         | 5        |
| 5     | 2904 ◊   | aP    | TRUE                  | TRUE   | TRUE              | TRUE  | TRUE         | 5        |
| 6     | 2912 *   | aP    | TRUE                  | TRUE   | TRUE              | TRUE  | TRUE         | 5        |
| 7     | 2915 *   | aP    | TRUE                  | TRUE   | TRUE              | TRUE  | TRUE         | 5        |
| 8     | 2928 *   | aP    | TRUE                  | TRUE   | TRUE              | TRUE  | TRUE         | 5        |
| 9     | 1829 *   | wP    | TRUE                  | TRUE   | TRUE              | TRUE  | TRUE         | 5        |
| 10    | 2383 *   | wP    | TRUE                  | TRUE   | TRUE              | TRUE  | TRUE         | 5        |
| 11    | 2687 *   | wP    | TRUE                  | TRUE   | TRUE              | TRUE  | TRUE         | 5        |
| 12    | 2691 *   | wP    | TRUE                  | TRUE   | TRUE              | TRUE  | TRUE         | 5        |
| 13    | 2696 *   | wP    | TRUE                  | TRUE   | TRUE              | TRUE  | TRUE         | 5        |
| 14    | 2702 *   | wP    | TRUE                  | TRUE   | TRUE              | TRUE  | TRUE         | 5        |
| 15    | 2703 *   | wP    | TRUE                  | TRUE   | TRUE              | TRUE  | TRUE         | 5        |
| 16    | 2726 *   | wP    | TRUE                  | TRUE   | TRUE              | TRUE  | TRUE         | 5        |
| 17    | 2732 *   | wP    | TRUE                  | TRUE   | TRUE              | TRUE  | TRUE         | 5        |
| 18    | 2738 *   | wP    | TRUE                  | TRUE   | TRUE              | TRUE  | TRUE         | 5        |
| 19    | 2685 *   | aP    | TRUE                  | TRUE   | FALSE             | FALSE | TRUE         | 3        |
| 20    | 2698 *   | aP    | TRUE                  | TRUE   | FALSE             | FALSE | TRUE         | 3        |
| 21    | 2728 *   | aP    | TRUE                  | TRUE   | FALSE             | FALSE | TRUE         | 3        |
| 22    | 2736 *   | aP    | TRUE                  | TRUE   | FALSE             | FALSE | TRUE         | 3        |
| 23    | 2900 *   | aP    | TRUE                  | TRUE   | FALSE             | FALSE | TRUE         | 3        |
| 24    | 2901 *   | aP    | TRUE                  | TRUE   | FALSE             | FALSE | TRUE         | 3        |
| 25    | 2923     | aP    | TRUE                  | TRUE   | FALSE             | FALSE | TRUE         | 3        |
| 26    | 2935 *   | aP    | TRUE                  | TRUE   | FALSE             | FALSE | TRUE         | 3        |
| 27    | 1655 *   | wP    | TRUE                  | TRUE   | FALSE             | FALSE | TRUE         | 3        |
| 28    | 1832 *   | wP    | TRUE                  | TRUE   | FALSE             | FALSE | TRUE         | 3        |
| 29    | 2704 *   | wP    | TRUE                  | TRUE   | FALSE             | FALSE | TRUE         | 3        |
| 30    | 2706 *   | wP    | TRUE                  | TRUE   | FALSE             | FALSE | TRUE         | 3        |
| 31    | 2707 *   | wP    | TRUE                  | TRUE   | FALSE             | FALSE | TRUE         | 3        |
| 32    | 2719 *   | wP    | TRUE                  | TRUE   | FALSE             | FALSE | TRUE         | 3        |
| 33    | 2884 *   | wP    | TRUE                  | TRUE   | FALSE             | FALSE | TRUE         | 3        |
| 34    | 1687 *   | wP    | TRUE                  | TRUE   | FALSE             | FALSE | FALSE        | 2        |
| 35    | 2686 *   | wP    | TRUE                  | TRUE   | FALSE             | FALSE | FALSE        | 2        |
| 36    | 2699 *   | wP    | TRUE                  | TRUE   | FALSE             | FALSE | FALSE        | 2        |
| 37    | 2921 *   | aP    | TRUE                  | FALSE  | FALSE             | FALSE | TRUE         | 2        |
| 38    | 2968 *   | aP    | TRUE                  | FALSE  | FALSE             | FALSE | TRUE         | 2        |
| 39    | 2997 *   | aP    | TRUE                  | FALSE  | FALSE             | FALSE | TRUE         | 2        |
| 40    | 2998 *   | aP    | TRUE                  | FALSE  | FALSE             | FALSE | TRUE         | 2        |
| 41    | 3000 *   | aP    | TRUE                  | FALSE  | FALSE             | FALSE | TRUE         | 2        |
| 42    | 2689 *   | aP    | TRUE                  | FALSE  | FALSE             | FALSE | FALSE        | 1        |
| 43    | 2887 *   | aP    | TRUE                  | FALSE  | FALSE             | FALSE | FALSE        | 1        |
| 44    | 2890 *   | aP    | TRUE                  | FALSE  | FALSE             | FALSE | FALSE        | 1        |
| 45    | 2922 *   | aP    | TRUE                  | FALSE  | FALSE             | FALSE | FALSE        | 1        |
| 46    | 2952 *   | aP    | TRUE                  | FALSE  | FALSE             | FALSE | FALSE        | 1        |
| 47    | 2976 *   | aP    | TRUE                  | FALSE  | FALSE             | FALSE | FALSE        | 1        |
| 48    | 2995 *   | aP    | TRUE                  | FALSE  | FALSE             | FALSE | FALSE        | 1        |
| 49    | 2500 *   | wP    | TRUE                  | FALSE  | FALSE             | FALSE | FALSE        | 1        |
| 50    | 2688 ◊   | wP    | TRUE                  | FALSE  | FALSE             | FALSE | FALSE        | 1        |
| 51    | 2690     | wP    | TRUE                  | FALSE  | FALSE             | FALSE | FALSE        | 1        |
| 52    | 2693 *   | wP    | TRUE                  | FALSE  | FALSE             | FALSE | FALSE        | 1        |
| 53    | 2729 *   | wP    | TRUE                  | FALSE  | FALSE             | FALSE | FALSE        | 1        |
| 54    | 2731 *   | wP    | TRUE                  | FALSE  | FALSE             | FALSE | FALSE        | 1        |
| 55    | 2883 *   | wP    | TRUE                  | FALSE  | FALSE             | FALSE | FALSE        | 1        |
| 56    | 2893 *   | wP    | TRUE                  | FALSE  | FALSE             | FALSE | FALSE        | 1        |
| 57    | 2895 *   | wP    | TRUE                  | FALSE  | FALSE             | FALSE | FALSE        | 1        |
| 58    | 2899 *   | wP    | TRUE                  | FALSE  | FALSE             | FALSE | FALSE        | 1        |
|       |          |       | 58                    | 36     | 18                | 18    | 38           | 58       |

\* antibody evaluation in plasma at 0, 1, 3, 7, 14, 30- and 90-120-days post boost

◊ antibody evaluation in plasma at 0, 1, 3, 7, 14- and 30-days post boost

○ antibody evaluation in plasma at 0, 1, 3, 7, 14- and 90-120-days post boost

*Supplementary Table 2 – Transcriptomic clusters perturbation Wilcoxon p-values*

|       | Wilcoxon p-value |          |          |
|-------|------------------|----------|----------|
|       | all              | wP       | aP       |
| TrC01 | 6.72E-04         | 2.27E-02 | 3.36E-03 |
| TrC02 | 1.10E-01         | 3.30E-01 | 7.71E-02 |
| TrC03 | 5.52E-05         | 1.12E-02 | 3.36E-03 |
| TrC04 | 1.03E-03         | 3.82E-02 | 1.13E-02 |
| TrC05 | 1.53E-04         | 7.78E-03 | 1.13E-02 |
| TrC06 | 1.09E-02         | 5.83E-02 | 4.86E-02 |
| TrC07 | 1.81E-02         | 1.79E-02 | 1.27E-01 |
| TrC08 | 2.91E-02         | 1.62E-01 | 8.73E-02 |
| TrC09 | 1.42E-04         | 1.34E-02 | 3.36E-03 |
| TrC10 | 8.69E-06         | 2.54E-03 | 3.36E-03 |
| TrC11 | 6.65E-04         | 1.52E-02 | 3.10E-02 |
| TrC12 | 2.32E-01         | 7.96E-02 | 6.05E-01 |
| TrC13 | 8.20E-05         | 5.73E-03 | 7.54E-03 |
| TrC14 | 3.89E-01         | 3.91E-01 | 1.98E-01 |
| TrC15 | 1.09E-02         | 9.10E-02 | 8.05E-02 |
| TrC16 | 7.20E-05         | 4.90E-03 | 1.09E-02 |
| TrC17 | 5.48E-06         | 1.09E-03 | 5.30E-02 |
| TrC18 | 6.69E-03         | 4.70E-03 | 1.37E-01 |
| TrC19 | 3.65E-01         | 2.68E-01 | 3.45E-01 |
| TrC20 | 5.42E-03         | 4.41E-03 | 5.29E-01 |
| TrC21 | 4.37E-02         | 4.41E-03 | 8.05E-02 |
| TrC22 | 7.55E-03         | 1.74E-02 | 4.55E-01 |
| TrC23 | 8.42E-03         | 5.42E-03 | 5.49E-01 |
| TrC24 | 5.10E-03         | 2.43E-02 | 4.46E-02 |
| TrC25 | 1.15E-04         | 1.62E-02 | 5.25E-03 |
| TrC26 | 1.88E-04         | 1.79E-02 | 6.85E-03 |
| TrC27 | 5.48E-06         | 1.09E-03 | 3.36E-03 |
| TrC28 | 1.42E-04         | 1.91E-02 | 3.36E-03 |
| TrC29 | 5.48E-06         | 6.47E-03 | 3.36E-03 |
| TrC30 | 3.04E-05         | 1.09E-03 | 3.36E-03 |
| TrC31 | 2.32E-05         | 1.09E-03 | 8.33E-03 |
| TrC32 | 7.55E-03         | 9.34E-03 | 4.74E-01 |
| TrC33 | 4.99E-01         | 3.60E-01 | 2.32E-01 |
| TrC34 | 2.95E-05         | 4.53E-03 | 6.24E-03 |
| TrC35 | 3.67E-05         | 6.08E-03 | 6.24E-03 |
| TrC36 | 9.36E-05         | 5.14E-03 | 7.71E-02 |
| TrC37 | 1.39E-03         | 1.52E-02 | 9.46E-02 |
| TrC38 | 1.47E-05         | 1.09E-03 | 7.42E-02 |
| TrC39 | 8.69E-06         | 3.31E-03 | 3.36E-03 |



**Supplementary Table 3. Identification of immune cell subsets in human PBMCs by CyTOF**

| Gate ID | Population name                   | Phenotype                                   | Gating Method |
|---------|-----------------------------------|---------------------------------------------|---------------|
| N/A     | Intercalator staining             | DNA-1 (191Ir) vs DNA-2 (193Ir) <sup>↓</sup> | Automated     |
| N/A     | Hematopoietic live cells staining | CD45+ (89Y) vs Viable- (195Pt) <sup>↓</sup> | Automated     |
| 1       | Monocytes                         | ↳HLA-DR+CD33+                               | Automated     |
| 2       | Classical Monocytes               | ↳HLA-DR+CD33+CD14+CD16-                     | Automated     |
| 3       | Intermediate Monocytes            | ↳HLA-DR+CD33+CD14+CD16+                     | Automated     |
| 4       | Non-classical Monocytes           | ↳HLA-DR+CD33+CD14-CD16+                     | Automated     |
| 5       | CD3+ T cells                      | ↳CD14-CD3+CD19-CD56-                        | Automated     |
| 6       | B cells                           | ↳CD14-CD3-CD19+                             | Automated     |
| 7       | CD8+ T cells                      | ↳CD14-CD3+CD19-CD56-CD4-CD8+                | Automated     |
| 8       | CD4+ T cells                      | ↳CD14-CD3+CD19-CD56-CD4+CD8-                | Automated     |
| 9       | CD4+ naive                        | ↳CD14-CD3+CD19-CD56-CD8-CD4+CD45RA+CCR7+    | Automated     |
| 10      | CD4+ Tcm                          | ↳CD14-CD3+CD19-CD56-CD8-CD4+CD45RA-CCR7+    | Automated     |
| 11      | CD4+ Tem                          | ↳CD14-CD3+CD19-CD56-CD8-CD4+CD45RA-CCR7-    | Automated     |
| 12      | CD4+ Temra                        | ↳CD14-CD3+CD19-CD56-CD8-CD4+CD45RA+CCR7-    | Automated     |
| 13      | CD8+ naive                        | ↳CD14-CD3+CD19-CD56-CD8+CD4-CD45RA+CCR7+    | Automated     |
| 14      | CD8+ Tcm                          | ↳CD14-CD3+CD19-CD56-CD8+CD4-CD45RA-CCR7+    | Automated     |
| 15      | CD8+ Tem                          | ↳CD14-CD3+CD19-CD56-CD8+CD4-CD45RA-CCR7-    | Automated     |
| 16      | CD8+ Temra                        | ↳CD14-CD3+CD19-CD56-CD8+CD4-CD45RA+CCR7-    | Automated     |
| 17      | Tregs                             | ↳CD14-CD3+CD19-CD56-CD4+CD8-CD25+           | Automated     |
| 18      | ASCs (Plasmablasts)               | ↳CD14-CD3-CD19+CD20-CD38+                   | Manual        |
| 19      | NK                                | ↳CD14-CD3-CD19-CD56+                        | Automated     |
| 20      | pDCs                              | ↳CD14-CD3-CD19-CD56-CD16-HLA-DR+CD1c-CD123+ | Automated     |
| 21      | mDCs                              | ↳CD14-CD3-CD19-CD56-CD16-HLA-DR+CD1c+CD123- | Automated     |

*Supplementary Table 4 – Cell frequencies vs transcriptomic cluster Spearman correlation r values*

| Cluster ID | Monocytes | CD33+HLADR+ | Classical_Monocytes | Non-Classical_Monocytes | Intermediate_Monocytes | Bcells | CD3CD19 | CD3CD19neg | CD3 Tcells | CD4Tcells | CD8Tcells | Tregs | TernaCD4 | NaiveCD4 | TemCD4 | TemCD4 | TemCD4 | TemCD4 | TemCD8 | NaiveCD8 | TemCD8 | TemCD8 | NK    | Basophils | mDC | pDC |
|------------|-----------|-------------|---------------------|-------------------------|------------------------|--------|---------|------------|------------|-----------|-----------|-------|----------|----------|--------|--------|--------|--------|--------|----------|--------|--------|-------|-----------|-----|-----|
| TrC01      | -0.14     | -0.14       | -0.17               | -0.01                   | 0.12                   | -0.21  | -0.02   | 0.09       | 0.09       | 0.11      | -0.02     | -0.08 | 0.19     | 0.06     | 0.09   | 0.17   | 0.14   | -0.09  | 0.09   | 0.16     | -0.15  | 0.07   | 0.10  | 0.07      |     |     |
| TrC02      | -0.12     | -0.12       | -0.16               | -0.08                   | 0.19                   | -0.32  | 0.06    | 0.16       | -0.02      | -0.13     | 0.02      | -0.07 | 0.04     | -0.21    | -0.03  | 0.13   | 0.12   | -0.03  | 0.14   | 0.30     | -0.11  | 0.01   | 0.12  | -0.04     |     |     |
| TrC03      | 0.13      | 0.13        | 0.16                | 0.00                    | -0.09                  | 0.21   | 0.05    | -0.11      | -0.07      | -0.07     | 0.07      | 0.13  | -0.19    | -0.09    | -0.03  | -0.06  | -0.09  | 0.09   | -0.03  | -0.03    | 0.15   | -0.06  | -0.13 | -0.12     |     |     |
| TrC04      | -0.10     | -0.10       | -0.07               | -0.07                   | -0.28                  | 0.27   | 0.07    | -0.08      | 0.07       | 0.10      | 0.07      | 0.00  | -0.06    | 0.19     | -0.01  | -0.13  | -0.18  | 0.16   | -0.15  | -0.25    | 0.18   | -0.11  | -0.24 | -0.05     |     |     |
| TrC05      | -0.20     | -0.20       | -0.17               | -0.20                   | -0.22                  | 0.13   | 0.18    | -0.08      | 0.10       | 0.09      | 0.24      | 0.01  | -0.17    | 0.10     | -0.03  | 0.04   | -0.19  | 0.30   | -0.07  | 0.06     | 0.15   | -0.11  | -0.28 | -0.16     |     |     |
| TrC06      | 0.28      | 0.28        | 0.32                | 0.17                    | -0.07                  | 0.27   | -0.08   | -0.12      | -0.09      | -0.07     | -0.09     | 0.13  | -0.11    | -0.01    | -0.04  | -0.20  | -0.07  | -0.06  | -0.08  | -0.30    | 0.14   | -0.01  | 0.01  | 0.03      |     |     |
| TrC07      | 0.54      | 0.54        | 0.56                | 0.20                    | 0.16                   | 0.20   | -0.11   | -0.15      | -0.30      | -0.28     | -0.12     | 0.18  | -0.30    | -0.32    | -0.08  | -0.16  | -0.01  | -0.13  | -0.02  | -0.09    | 0.04   | 0.07   | 0.15  | 0.03      |     |     |
| TrC08      | 0.05      | 0.05        | 0.08                | 0.09                    | -0.20                  | 0.27   | -0.04   | -0.10      | 0.04       | 0.08      | -0.06     | 0.02  | 0.03     | 0.19     | -0.01  | -0.20  | -0.08  | 0.00   | -0.13  | -0.37    | 0.13   | -0.08  | -0.08 | 0.09      |     |     |
| TrC09      | -0.09     | -0.10       | -0.13               | 0.05                    | 0.08                   | -0.14  | -0.06   | 0.08       | 0.09       | 0.14      | -0.08     | -0.08 | 0.26     | 0.14     | 0.10   | 0.09   | 0.15   | -0.14  | 0.07   | -0.01    | -0.15  | 0.04   | 0.10  | 0.10      |     |     |
| TrC10      | -0.02     | -0.03       | -0.05               | 0.10                    | 0.07                   | -0.07  | -0.09   | 0.07       | 0.03       | 0.11      | -0.17     | -0.10 | 0.26     | 0.15     | 0.07   | -0.01  | 0.11   | -0.19  | -0.01  | -0.13    | -0.14  | 0.06   | 0.13  | 0.14      |     |     |
| TrC11      | 0.74      | 0.74        | 0.76                | 0.30                    | 0.28                   | 0.20   | -0.17   | -0.12      | -0.43      | -0.40     | -0.28     | 0.15  | -0.31    | -0.46    | -0.09  | -0.22  | 0.05   | -0.29  | -0.06  | -0.13    | 0.03   | 0.12   | 0.33  | 0.14      |     |     |
| TrC12      | 0.69      | 0.69        | 0.72                | 0.35                    | 0.20                   | 0.24   | -0.20   | -0.13      | -0.34      | -0.30     | -0.31     | 0.16  | -0.20    | -0.30    | -0.09  | -0.27  | 0.05   | -0.31  | -0.10  | -0.30    | 0.06   | 0.10   | 0.31  | 0.19      |     |     |
| TrC13      | -0.19     | -0.18       | -0.18               | -0.22                   | -0.05                  | -0.04  | 0.25    | -0.01      | 0.02       | -0.10     | 0.26      | 0.00  | -0.25    | -0.13    | -0.13  | 0.07   | -0.12  | 0.29   | 0.01   | 0.30     | 0.09   | -0.09  | -0.20 | -0.20     |     |     |
| TrC14      | 0.57      | 0.56        | 0.59                | 0.31                    | 0.11                   | 0.20   | -0.17   | -0.12      | -0.26      | -0.24     | -0.27     | 0.17  | -0.14    | -0.21    | -0.06  | -0.26  | 0.03   | -0.26  | -0.09  | -0.34    | 0.08   | 0.03   | 0.26  | 0.17      |     |     |
| TrC15      | -0.13     | -0.12       | -0.15               | -0.11                   | 0.17                   | -0.33  | 0.12    | 0.14       | -0.04      | -0.18     | 0.06      | 0.01  | -0.01    | -0.28    | -0.06  | 0.12   | 0.09   | 0.00   | 0.13   | 0.36     | -0.08  | -0.01  | 0.03  | -0.13     |     |     |
| TrC16      | -0.03     | -0.02       | -0.04               | -0.09                   | 0.16                   | -0.22  | 0.15    | 0.10       | -0.11      | -0.28     | 0.10      | 0.05  | -0.18    | -0.39    | -0.12  | 0.07   | 0.02   | 0.07   | 0.12   | 0.36     | 0.00   | -0.06  | 0.00  | -0.16     |     |     |
| TrC17      | 0.70      | 0.71        | 0.72                | 0.44                    | 0.30                   | 0.21   | -0.24   | -0.04      | -0.40      | -0.33     | -0.40     | 0.04  | -0.10    | -0.34    | -0.07  | -0.29  | 0.13   | -0.41  | -0.08  | -0.35    | -0.02  | 0.10   | 0.39  | 0.26      |     |     |
| TrC18      | -0.32     | -0.34       | -0.31               | -0.12                   | -0.30                  | 0.20   | 0.09    | -0.05      | 0.23       | 0.30      | 0.09      | -0.11 | 0.12     | 0.46     | 0.01   | -0.08  | -0.19  | 0.19   | -0.16  | -0.25    | 0.11   | -0.10  | -0.26 | 0.02      |     |     |
| TrC19      | 0.20      | 0.20        | 0.22                | 0.22                    | -0.09                  | 0.29   | -0.08   | -0.09      | -0.04      | 0.02      | -0.16     | 0.04  | 0.06     | 0.12     | -0.01  | -0.22  | -0.01  | -0.13  | -0.12  | -0.41    | 0.09   | -0.06  | 0.02  | 0.12      |     |     |
| TrC20      | -0.54     | -0.56       | -0.53               | -0.35                   | -0.39                  | -0.02  | 0.06    | -0.14      | 0.43       | 0.58      | 0.24      | -0.06 | 0.14     | 0.66     | 0.17   | 0.24   | -0.19  | 0.31   | -0.11  | 0.05     | -0.09  | 0.02   | -0.27 | 0.02      |     |     |
| TrC21      | 0.05      | 0.05        | 0.04                | -0.06                   | 0.04                   | -0.29  | -0.14   | 0.10       | -0.11      | 0.00      | -0.12     | 0.01  | 0.09     | -0.06    | 0.17   | 0.02   | -0.25  | -0.08  | 0.01   | 0.02     | -0.10  | 0.22   | 0.13  | 0.13      |     |     |
| TrC22      | -0.19     | -0.15       | -0.22               | 0.23                    | 0.04                   | 0.07   | 0.17    | 0.70       | -0.28      | -0.36     | -0.14     | -0.41 | 0.09     | -0.28    | -0.03  | -0.43  | 0.11   | -0.16  | 0.12   | -0.36    | 0.63   | -0.47  | -0.13 | -0.20     |     |     |
| TrC23      | 0.67      | 0.67        | 0.68                | 0.25                    | 0.40                   | 0.00   | -0.13   | -0.02      | -0.49      | -0.50     | -0.28     | 0.12  | -0.30    | -0.62    | -0.11  | -0.15  | 0.07   | -0.29  | -0.03  | 0.08     | -0.04  | 0.12   | 0.34  | 0.08      |     |     |
| TrC24      | -0.34     | -0.32       | -0.33               | 0.02                    | -0.08                  | 0.74   | 0.36    | 0.16       | -0.13      | -0.04     | 0.05      | -0.28 | 0.00     | 0.09     | -0.22  | -0.18  | -0.03  | 0.15   | -0.29  | -0.04    | 0.24   | -0.31  | -0.45 | -0.31     |     |     |
| TrC25      | 0.32      | 0.33        | 0.36                | 0.20                    | -0.08                  | 0.27   | -0.16   | -0.11      | -0.13      | -0.06     | -0.12     | 0.19  | -0.10    | -0.03    | 0.07   | -0.16  | -0.02  | -0.13  | -0.02  | -0.26    | 0.13   | 0.01   | 0.02  | 0.02      |     |     |
| TrC26      | 0.07      | 0.07        | 0.08                | 0.18                    | -0.04                  | 0.22   | -0.06   | -0.04      | 0.00       | 0.07      | -0.17     | -0.09 | 0.13     | 0.21     | -0.01  | -0.21  | 0.04   | -0.14  | -0.10  | -0.35    | -0.01  | -0.06  | 0.04  | 0.11      |     |     |
| TrC27      | -0.09     | -0.11       | -0.06               | -0.06                   | -0.24                  | 0.30   | 0.05    | -0.18      | 0.20       | 0.21      | 0.16      | 0.09  | 0.09     | 0.27     | -0.03  | 0.03   | -0.19  | 0.27   | -0.01  | -0.10    | 0.07   | 0.02   | -0.31 | -0.19     |     |     |
| TrC28      | 0.37      | 0.38        | 0.38                | 0.12                    | 0.21                   | -0.01  | 0.00    | -0.03      | -0.30      | -0.37     | -0.07     | 0.17  | -0.25    | -0.50    | -0.07  | -0.03  | 0.06   | -0.13  | 0.07   | 0.19     | 0.04   | -0.02  | 0.11  | -0.09     |     |     |
| TrC29      | 0.36      | 0.36        | 0.36                | 0.34                    | 0.17                   | 0.15   | -0.16   | 0.01       | -0.20      | -0.08     | -0.36     | -0.04 | 0.15     | -0.04    | 0.01   | -0.20  | 0.11   | -0.35  | -0.09  | -0.37    | -0.05  | 0.02   | 0.22  | 0.20      |     |     |
| TrC30      | 0.34      | 0.34        | 0.34                | 0.25                    | 0.18                   | 0.08   | -0.19   | -0.08      | -0.12      | 0.02      | -0.26     | 0.01  | 0.19     | -0.03    | 0.10   | 0.00   | 0.17   | -0.31  | 0.01   | -0.14    | -0.22  | 0.11   | 0.19  | 0.11      |     |     |
| TrC31      | 0.20      | 0.18        | 0.20                | 0.02                    | 0.12                   | 0.22   | -0.07   | -0.08      | -0.12      | -0.03     | -0.14     | -0.18 | -0.08    | 0.03     | -0.15  | -0.17  | 0.09   | -0.10  | -0.24  | -0.25    | -0.10  | 0.10   | 0.09  | 0.32      |     |     |
| TrC32      | -0.63     | -0.66       | -0.63               | -0.52                   | -0.38                  | -0.30  | 0.04    | -0.14      | 0.50       | 0.61      | 0.38      | -0.01 | 0.08     | 0.61     | 0.24   | 0.44   | -0.23  | 0.45   | 0.00   | 0.33     | -0.16  | 0.09   | -0.29 | -0.01     |     |     |
| TrC33      | -0.09     | -0.10       | -0.05               | -0.18                   | -0.08                  | 0.15   | 0.07    | -0.14      | 0.04       | 0.20      | 0.13      | -0.06 | 0.08     | 0.14     | 0.20   | 0.11   | 0.10   | 0.11   | 0.14   | 0.12     | -0.21  | 0.04   | -0.26 | -0.25     |     |     |
| TrC34      | -0.21     | -0.20       | -0.18               | -0.17                   | -0.20                  | -0.02  | 0.08    | 0.04       | 0.06       | 0.07      | 0.14      | 0.14  | 0.03     | 0.00     | 0.05   | 0.12   | -0.13  | 0.16   | 0.00   | 0.14     | 0.17   | -0.12  | -0.25 | -0.22     |     |     |
| TrC35      | -0.13     | -0.13       | -0.13               | 0.06                    | -0.08                  | 0.03   | -0.04   | 0.03       | 0.12       | 0.15      | -0.10     | -0.14 | 0.22     | 0.30     | 0.01   | -0.15  | -0.06  | -0.04  | -0.08  | -0.32    | -0.04  | 0.04   | 0.01  | 0.16      |     |     |
| TrC36      | -0.64     | -0.65       | -0.62               | -0.54                   | -0.36                  | -0.12  | 0.19    | -0.10      | 0.39       | 0.46      | 0.39      | 0.02  | 0.02     | 0.52     | 0.09   | 0.30   | -0.27  | 0.51   | -0.14  | 0.32     | -0.03  | 0.03   | -0.37 | -0.13     |     |     |
| TrC37      | 0.11      | 0.11        | 0.12                | 0.17                    | -0.03                  | 0.03   | -0.12   | -0.14      | 0.15       | 0.16      | 0.10      | 0.21  | 0.09     | 0.10     | 0.13   | 0.22   | 0.08   | 0.00   | 0.25   | 0.17     | -0.09  | 0.11   | -0.02 | -0.24     |     |     |
| TrC38      | 0.43      | 0.41        | 0.44                | 0.10                    | 0.15                   | 0.30   | -0.05   | -0.18      | -0.22      | -0.17     | -0.17     | -0.10 | -0.23    | -0.12    | -0.20  | -0.23  | 0.01   | -0.13  | -0.27  | -0.24    | -0.08  | 0.16   | 0.17  | 0.30      |     |     |
| TrC39      | -0.18     | -0.18       | -0.17               | -0.17                   | -0.12                  | -0.14  | 0.08    | 0.06       | 0.04       | 0.00      | 0.12      | 0.20  | 0.05     | -0.10    | 0.06   | 0.18   | -0.06  | 0.11   | 0.07   | 0.26     | 0.09   | -0.09  | -0.19 | -0.23     |     |     |

*Supplementary Table 5 - Transcriptomic clusters Mann-Whitney p-values group comparison*

| Cluster | Days post boost |      |      |      |      |
|---------|-----------------|------|------|------|------|
|         | 0d              | 1d   | 3d   | 7d   | 14d  |
| TrC01   | 0.06            | 0.21 | 0.59 | 0.22 | 0.12 |
| TrC02   | 0.07            | 0.26 | 0.59 | 0.23 | 0.12 |
| TrC03   | 0.06            | 0.34 | 0.59 | 0.30 | 0.27 |
| TrC04   | 0.06            | 0.08 | 0.59 | 0.45 | 0.27 |
| TrC05   | 0.30            | 0.57 | 0.59 | 0.78 | 0.57 |
| TrC06   | 0.04            | 0.11 | 0.59 | 0.28 | 0.24 |
| TrC07   | 0.14            | 0.72 | 0.75 | 0.30 | 0.27 |
| TrC08   | 0.06            | 0.04 | 0.59 | 0.30 | 0.35 |
| TrC09   | 0.33            | 0.34 | 0.59 | 0.23 | 0.13 |
| TrC10   | 0.73            | 0.43 | 0.59 | 0.30 | 0.14 |
| TrC11   | 0.47            | 0.96 | 0.99 | 0.30 | 0.40 |
| TrC12   | 0.06            | 0.51 | 0.66 | 0.22 | 0.27 |
| TrC13   | 0.91            | 0.96 | 0.90 | 0.86 | 0.96 |
| TrC14   | 0.04            | 0.34 | 0.59 | 0.23 | 0.27 |
| TrC15   | 0.33            | 0.28 | 0.59 | 0.30 | 0.21 |
| TrC16   | 0.96            | 0.51 | 0.59 | 0.66 | 0.39 |
| TrC17   | 0.14            | 0.96 | 0.93 | 0.22 | 0.54 |
| TrC18   | 0.47            | 0.34 | 0.76 | 0.84 | 0.93 |
| TrC19   | 0.07            | 0.08 | 0.59 | 0.23 | 0.27 |
| TrC20   | 0.53            | 0.96 | 0.65 | 0.66 | 0.27 |
| TrC21   | 0.53            | 0.66 | 0.90 | 0.23 | 0.90 |
| TrC22   | 0.33            | 0.38 | 0.59 | 0.85 | 0.99 |
| TrC23   | 0.82            | 0.34 | 0.59 | 0.86 | 0.99 |
| TrC24   | 0.33            | 0.21 | 0.59 | 0.30 | 0.21 |
| TrC25   | 0.06            | 0.28 | 0.59 | 0.23 | 0.27 |
| TrC26   | 0.64            | 0.34 | 0.59 | 0.38 | 0.99 |
| TrC27   | 0.00            | 0.02 | 0.21 | 0.23 | 0.04 |
| TrC28   | 0.47            | 0.72 | 0.66 | 0.85 | 0.82 |
| TrC29   | 0.33            | 0.96 | 0.59 | 0.30 | 0.50 |
| TrC30   | 0.91            | 0.56 | 0.59 | 0.58 | 0.21 |
| TrC31   | 0.91            | 0.34 | 0.38 | 0.01 | 0.27 |
| TrC32   | 0.15            | 0.57 | 0.66 | 0.22 | 0.13 |
| TrC33   | 0.96            | 0.96 | 0.70 | 0.30 | 0.65 |
| TrC34   | 0.06            | 0.90 | 0.90 | 0.84 | 0.73 |
| TrC35   | 0.82            | 0.96 | 0.99 | 0.86 | 0.27 |
| TrC36   | 0.81            | 0.96 | 0.99 | 0.30 | 0.40 |
| TrC37   | 0.10            | 0.36 | 0.59 | 0.84 | 0.51 |
| TrC38   | 0.54            | 0.36 | 0.38 | 0.01 | 0.04 |
| TrC39   | 0.14            | 0.69 | 0.59 | 0.85 | 0.41 |

**Supplementary Table 6 – Cohort demographic information**

| DONOR ID | AGE | GENDER | ETHNICITY              | RACE                                      | COHORT | PRIMING VACCINE | BOOSTER VACCINE | VACCINATION DAY | BIRTH YEAR |
|----------|-----|--------|------------------------|-------------------------------------------|--------|-----------------|-----------------|-----------------|------------|
| 1655     | 29  | F      | Not Hispanic or Latino | White                                     | wP     | DTP             | Tdap            | 09/12/2016      | 1/1/86     |
| 1687     | 33  | F      | Unknown                | White                                     | wP     | DTP             | Tdap            | 10/10/2016      | 1/1/83     |
| 1829     | 28  | M      | Not Hispanic or Latino | Asian                                     | wP     | DTP             | Tdap            | 08/29/2016      | 1/1/88     |
| 1832     | 24  | M      | Not Hispanic or Latino | Asian                                     | wP     | DTP             | Tdap            | 08/29/2016      | 1/1/91     |
| 2383     | 28  | F      | Not Hispanic or Latino | White                                     | wP     | DTP             | Tdap            | 10/10/2016      | 1/1/88     |
| 2500     | 34  | F      | Hispanic or Latino     | More than one race                        | wP     | DTP             | Tdap            | 11/07/2016      | 1/1/81     |
| 2685     | 19  | M      | Not Hispanic or Latino | Asian                                     | aP     | DTP             | Tdap            | 07/25/2016      | 1/1/96     |
| 2686     | 34  | F      | Not Hispanic or Latino | Asian                                     | wP     | DTP             | Tdap            | 07/25/2016      | 1/1/82     |
| 2687     | 30  | F      | Hispanic or Latino     | Unknown                                   | wP     | DTP             | Tdap            | 08/29/2016      | 1/1/86     |
| 2688     | 33  | M      | Not Hispanic or Latino | Asian                                     | wP     | DTP             | Tdap            | 07/25/2016      | 1/1/82     |
| 2689     | 19  | M      | Not Hispanic or Latino | White                                     | aP     | DTP             | Tdap            | 07/25/2016      | 1/1/97     |
| 2690     | 22  | M      | Not Hispanic or Latino | White                                     | wP     | DTP             | Tdap            | 08/15/2016      | 1/1/93     |
| 2691     | 27  | M      | Not Hispanic or Latino | Asian                                     | wP     | DTP             | Tdap            | 08/15/2016      | 1/1/89     |
| 2693     | 34  | F      | Hispanic or Latino     | Unknown                                   | wP     | DTP             | Tdap            | 07/25/2016      | 1/1/87     |
| 2696     | 35  | F      | Hispanic or Latino     | White                                     | wP     | DTP             | Tdap            | 09/12/2016      | 1/1/80     |
| 2698     | 19  | F      | Hispanic or Latino     | Unknown                                   | aP     | DTaP            | Tdap            | 08/29/2016      | 1/1/97     |
| 2699     | 21  | M      | Not Hispanic or Latino | Asian                                     | wP     | DTP             | Tdap            | 09/26/2016      | 1/1/94     |
| 2702     | 35  | F      | Not Hispanic or Latino | White                                     | wP     | DTP             | Tdap            | 08/29/2016      | 1/1/81     |
| 2703     | 33  | M      | Not Hispanic or Latino | White                                     | wP     | DTP             | Tdap            | 08/29/2016      | 1/1/83     |
| 2704     | 31  | F      | Not Hispanic or Latino | White                                     | wP     | DTP             | Tdap            | 08/29/2016      | 1/1/85     |
| 2706     | 25  | F      | Not Hispanic or Latino | White                                     | wP     | DTP             | Tdap            | 09/26/2016      | 1/1/91     |
| 2707     | 24  | F      | Not Hispanic or Latino | Asian                                     | wP     | DTP             | Tdap            | 09/13/2016      | 1/1/92     |
| 2719     | 26  | F      | Not Hispanic or Latino | Black or African American                 | wP     | DTP             | Tdap            | 09/13/2016      | 1/1/88     |
| 2726     | 33  | F      | Hispanic or Latino     | Unknown                                   | wP     | DTP             | Tdap            | 09/26/2016      | 1/1/83     |
| 2728     | 19  | F      | Not Hispanic or Latino | Asian                                     | aP     | DTP             | Tdap            | 09/26/2016      | 1/1/97     |
| 2729     | 34  | M      | Unknown                | Unknown                                   | wP     | DTP             | Tdap            | 09/26/2016      | 1/1/82     |
| 2730     | 19  | M      | Hispanic or Latino     | White                                     | aP     | DTaP            | Tdap            | 09/26/2016      | 1/1/97     |
| 2731     | 27  | F      | Hispanic or Latino     | White                                     | wP     | DTP             | Tdap            | 09/26/2016      | 1/1/88     |
| 2732     | 26  | F      | Not Hispanic or Latino | Asian                                     | wP     | DTP             | Tdap            | 09/26/2016      | 1/1/89     |
| 2736     | 19  | M      | Not Hispanic or Latino | Native Hawaiian or Other Pacific Islander | aP     | DTaP            | Tdap            | 10/24/2016      | 1/1/97     |
| 2738     | 26  | M      | Hispanic or Latino     | More than one race                        | wP     | DTP             | Tdap            | 10/10/2016      | 1/1/90     |
| 2883     | 33  | F      | Hispanic or Latino     | Unknown                                   | wP     | DTP             | Tdap            | 10/24/2016      | 1/1/83     |
| 2884     | 25  | M      | Unknown                | White                                     | wP     | DTP             | Tdap            | 10/10/2016      | 1/1/91     |
| 2886     | 18  | F      | Hispanic or Latino     | White                                     | aP     | DTaP            | Tdap            | 10/24/2016      | 1/1/97     |
| 2887     | 18  | F      | Not Hispanic or Latino | More than one race                        | aP     | DTaP            | Tdap            | 11/07/2016      | 1/1/98     |
| 2890     | 19  | F      | Not Hispanic or Latino | White                                     | aP     | DTaP            | Tdap            | 10/24/2016      | 1/1/97     |
| 2893     | 30  | F      | Not Hispanic or Latino | White                                     | wP     | DTP             | Tdap            | 10/24/2016      | 1/1/85     |
| 2895     | 22  | F      | Not Hispanic or Latino | Asian                                     | wP     | DTP             | Tdap            | 10/24/2016      | 1/1/94     |
| 2899     | 31  | M      | Not Hispanic or Latino | White                                     | wP     | DTP             | Tdap            | 11/07/2016      | 1/1/85     |
| 2900     | 19  | F      | Not Hispanic or Latino | Asian                                     | aP     | DTaP            | Tdap            | 11/07/2016      | 1/1/97     |
| 2901     | 18  | F      | Not Hispanic or Latino | More than one race                        | aP     | DTaP            | Tdap            | 11/07/2016      | 1/1/98     |
| 2902     | 18  | F      | Hispanic or Latino     | More than one race                        | aP     | DTaP            | Tdap            | 11/07/2016      | 1/1/98     |
| 2903     | 19  | F      | Not Hispanic or Latino | Asian                                     | aP     | DTaP            | Tdap            | 11/28/2016      | 1/1/97     |
| 2904     | 18  | F      | Not Hispanic or Latino | Unknown                                   | aP     | DTaP            | Tdap            | 11/07/2016      | 1/1/98     |
| 2912     | 19  | F      | Not Hispanic or Latino | White                                     | aP     | DTaP            | Tdap            | 11/28/2016      | 1/1/96     |
| 2915     | 18  | F      | Not Hispanic or Latino | White                                     | aP     | DTaP            | Tdap            | 01/17/2017      | 1/1/98     |
| 2921     | 18  | F      | Not Hispanic or Latino | White                                     | aP     | DTaP            | Tdap            | 01/17/2017      | 1/1/97     |
| 2922     | 19  | F      | Not Hispanic or Latino | Asian                                     | aP     | DTaP            | Tdap            | 11/28/2016      | 1/1/97     |
| 2923     | 19  | M      | Not Hispanic or Latino | White                                     | aP     | DTaP            | Tdap            | 11/28/2016      | 1/1/97     |
| 2928     | 18  | M      | Not Hispanic or Latino | More than one race                        | aP     | DTaP            | Tdap            | 01/03/2017      | 1/1/98     |
| 2935     | 18  | F      | Hispanic or Latino     | Unknown                                   | aP     | DTaP            | Tdap            | 01/03/2017      | 1/1/98     |
| 2952     | 19  | F      | Not Hispanic or Latino | Asian                                     | aP     | DTaP            | Tdap            | 01/17/2017      | 1/1/97     |
| 2968     | 19  | F      | Not Hispanic or Latino | Asian                                     | aP     | DTaP            | Tdap            | 01/17/2017      | 1/1/97     |
| 2976     | 19  | F      | Not Hispanic or Latino | Asian                                     | aP     | DTaP            | Tdap            | 01/30/2017      | 1/1/97     |
| 2995     | 20  | F      | Not Hispanic or Latino | Asian                                     | aP     | DTaP            | Tdap            | 01/30/2017      | 1/1/96     |
| 2997     | 19  | F      | Hispanic or Latino     | Unknown                                   | aP     | DTaP            | Tdap            | 01/30/2017      | 1/1/97     |
| 2998     | 19  | F      | Hispanic or Latino     | More than one race                        | aP     | DTaP            | Tdap            | 01/30/2017      | 1/1/97     |
| 3000     | 19  | M      | Hispanic or Latino     | White                                     | aP     | DTaP            | Tdap            | 01/30/2017      | 1/1/97     |

**Supplementary Table 7 – Proteomics excluded assays and exclusion criteria Olink PEA**

| Count | Olink panel                   | Assay      | Uniprot ID    | Reason for exclusion |
|-------|-------------------------------|------------|---------------|----------------------|
| 1     | Olink IMMUNE RESPONSE(v.3202) | ARNT       | P27540        | ≤ LOD                |
| 2     | Olink IMMUNE RESPONSE(v.3202) | BIRC2      | Q13490        | ≤ LOD                |
| 3     | Olink IMMUNE RESPONSE(v.3202) | DGKZ       | Q13574        | ≤ LOD                |
| 4     | Olink IMMUNE RESPONSE(v.3202) | EIF5A      | P63241        | ≤ LOD                |
| 5     | Olink METABOLISM(v.3402)      | GLRX       | P35754        | ≤ LOD                |
| 6     | Olink IMMUNO-ONCOLOGY(v.3101) | IFN-beta   | P01574        | ≤ LOD                |
| 7     | Olink IMMUNO-ONCOLOGY(v.3101) | IFN-gamma  | P01579        | ≤ LOD                |
| 8     | Olink IMMUNE RESPONSE(v.3202) | IFNLR1     | Q8IU57        | ≤ LOD                |
| 9     | Olink IMMUNO-ONCOLOGY(v.3101) | IL-1 alpha | P01583        | ≤ LOD                |
| 10    | Olink IMMUNO-ONCOLOGY(v.3101) | IL-21      | Q9HBE4        | ≤ LOD                |
| 11    | Olink IMMUNO-ONCOLOGY(v.3101) | IL-35      | Q14213,P29459 | ≤ LOD                |
| 12    | Olink IMMUNO-ONCOLOGY(v.3101) | IL13       | P35225        | ≤ LOD                |
| 13    | Olink IMMUNO-ONCOLOGY(v.3101) | IL2        | P60568        | ≤ LOD                |
| 14    | Olink IMMUNO-ONCOLOGY(v.3101) | IL33       | O95760        | ≤ LOD                |
| 15    | Olink IMMUNE RESPONSE(v.3202) | IRAK4      | Q9NWZ3        | ≤ LOD                |
| 16    | Olink IMMUNE RESPONSE(v.3202) | KPNA1      | P52294        | ≤ LOD                |
| 17    | Olink IMMUNE RESPONSE(v.3202) | NF2        | P35240        | ≤ LOD                |
| 18    | Olink METABOLISM(v.3402)      | NQO2       | P16083        | ≤ LOD                |
| 19    | Olink IMMUNO-ONCOLOGY(v.3101) | PTN        | P21246        | ≤ LOD                |
| 20    | Olink METABOLISM(v.3402)      | S100P      | P25815        | ≤ LOD                |
| 21    | Olink IMMUNO-ONCOLOGY(v.3101) | TNF        | P01375        | ≤ LOD                |
| 22    | Olink IMMUNE RESPONSE(v.3202) | CD28       | P10747        | ≤ LOD                |
| 23    | Olink IMMUNO-ONCOLOGY(v.3101) | CD28       | P10747        | ≤ LOD                |
| 24    | Olink IMMUNO-ONCOLOGY(v.3101) | CD83       | Q01151        | Duplicate            |
| 25    | Olink IMMUNO-ONCOLOGY(v.3101) | CXCL12     | P48061        | Duplicate            |
| 26    | Olink IMMUNO-ONCOLOGY(v.3101) | FGF2       | P09038        | Duplicate            |
| 27    | Olink IMMUNO-ONCOLOGY(v.3101) | IL10       | P22301        | Duplicate            |
| 28    | Olink IMMUNO-ONCOLOGY(v.3101) | IL12RB1    | P42701        | Duplicate            |
| 29    | Olink IMMUNO-ONCOLOGY(v.3101) | IL5        | P05113        | Duplicate            |
| 30    | Olink IMMUNO-ONCOLOGY(v.3101) | IL6        | P05231        | Duplicate            |
| 31    | Olink IMMUNO-ONCOLOGY(v.3101) | KLRD1      | Q13241        | Duplicate            |
| 32    | Olink IMMUNO-ONCOLOGY(v.3101) | LAMP3      | Q9UQV4        | Duplicate            |
| 33    | Olink IMMUNO-ONCOLOGY(v.3101) | NCR1       | O76036        | Duplicate            |
| 34    | Olink IMMUNO-ONCOLOGY(v.3101) | ANGPT2     | O15123        | Duplicate            |
| 35    | Olink IMMUNO-ONCOLOGY(v.3101) | ARG1       | P05089        | Duplicate            |

*Supplementary Table 8 – CyTOF antibodies and conjugations*

| <b>Marker</b> | <b>Metal</b> | <b>Clone</b> | <b>Cat#</b> | <b>Source</b>            |
|---------------|--------------|--------------|-------------|--------------------------|
| CD45          | 89Y          | HI30         | 3089003B    | Fluidigm                 |
| CD3           | 115In        | UCHT1        | 300443      | Biolegend                |
| CD19          | 142Nd        | HIB19        | 3142001B    | Fluidigm                 |
| CD38          | 144Nd        | HIT2         | 3144014B    | Fluidigm                 |
| CD4           | 145Nd        | RPA-T4       | 3145001B    | Fluidigm                 |
| CD20          | 145Nd        | 2H7          | 302302      | Biolegend                |
| CD123         | 151Eu        | 6H6          | 3151001B    | Fluidigm                 |
| CD45RA        | 155Gd        | HI100        | 3155011B    | Fluidigm                 |
| CD1c          | 160Gd        | L161         | 331502      | Biolegend                |
| CD33          | 163Dy        | WM53         | 3163023B    | Fluidigm                 |
| CCR7          | 167Er        | G043H7       | 3167009A    | Fluidigm                 |
| CD25          | 169Tm        | M-A251       | 3169003B    | Fluidigm                 |
| CD8a          | 172Yb        | RPA-T8       | 301002      | Biolegend                |
| CD14          | 173Yb        | 61D3         | 14-0149-82  | Thermo Fisher Scientific |
| HLA-DR        | 174Yb        | L243         | 3174001B    | Fluidigm                 |
| CD56          | 176Yb        | CMSSB        | 3176003B    | Fluidigm                 |
| CD16          | 209Bi        | 3G8          | 3209002B    | Fluidigm                 |

## Supplementary Methods

### RNA-seq analysis

**Clustering analysis.** For clustering RNA-Seq data, weighted gene co-expression network analysis (WGCNA) was performed to identify sets of genes that share a similar expression (Langfelder et al. 2008, Langfelder et al. 2012) WGCNA parameters were set in the following way: minModuleSize = 20, deepSplit = 4 and MEDissThres= 0. The 8,000 most variable genes that were considerably expressed (max (TMP > 5) among all samples) were considered as input for the WGCNA analysis.

For clustering of proteomics data (PrCXX clusters), only proteins with average intra-donor coefficient of variation greater than 0.1 were considered, i.e. those which were substantially altered after the immunization. Then the distance matrix across all samples using correlation metric was computed. ‘Average’ linkage method was applied to construct dendrograms. Threshold for cluster assignment was chosen based on similar approach as for transcriptomic data, finding a trade-off between inclusion of proteins into clusters and cluster tightness (**Supplementary Figure 5**). Detailed code used for RNA-Seq and proteomic cluster analysis can be found in [https://github.com/JasonPBennett/Pertussis\\_2020](https://github.com/JasonPBennett/Pertussis_2020) for reproducing the results.

**Identification of perturbed clusters.** For each of the transcriptomic modules or proteomic clusters, the first principal component was extracted by collapsing gene/protein dimension. Then for each of the modules/clusters, two timepoints were identified: the timepoint with the highest PC1 value and the timepoint with the lowest PC1 value averaging using the median across the donors considered. Then Wilcoxon test (paired) was applied to the highest point vs. lowest point to check statistical significance of the perturbations among the two timepoints for a particular module/cluster. Obtained p-values were then FDR corrected for the number of modules/clusters considered.

**Identification of common longitudinal perturbation patterns among RNA-Seq clusters.** PC1 of every cluster was mean centered and min-max normalized. These normalized PC1 values varying from -1.0 to 1.0 (due to min-max normalization) were subject to hierarchical clustering. For computation of pairwise distance, *scipy.spatial.distance.pdist* function with metric “cityblock” was used. Distance matrix was linked using *scipy.cluster.hierarchy.linkage* function with “average” method. Resulting dendrogram was cut at 0.4 of maximum variance. Resulting group clusters are shown in **Supplementary Figure 2.**

**Differential expression analysis.** The analysis was done using Bioconductor package DESeq2 (Banus et al. 2006). For each of the timepoints profiled, aP vs. wP analysis was undertaken. To reduce the number of comparisons, only the genes with mean TPM>1 across all the donors for a particular timepoint were taken into consideration. Genes were considered differentially expressed when the analysis resulted in a Benjamini-Hochberg  $p_{adj} < 0.05$ .

**Function characterization of gene sets.** For inferring transcriptional patterns of genes belonging to a cluster, the first principal component was extracted using principal component analysis reducing the gene/protein dimension. Gene Ontology enrichment was done in GOnet web application (Subramanian et al. 2005).

**Statistical comparisons of donor groups.** To find gene modules significantly different between aP and wP individuals at different timepoints two-sided Mann Whitney U-test with continuity correction was used to reject null hypothesis of the same PC1 value of the module considered. To control for multiple comparisons due to multiple gene modules and timepoints, FDR correction Benjamini-Hochberg was used. Perturbation of gene expression and cell type frequencies were evaluated using Paired Wilcoxon test. Comparisons between groups at determinate timepoints were made using the nonparametric Two-tailed Unpaired Mann-Whitney U test. Prism 5.0 (GraphPad) was used for all these



calculations. All data in all figures in which error bars are shown is presented as median  $\pm$  interquartile range. A p value  $<0.05$  was considered statistically significant and specific p values are shown for each figure.
